# Supplementary material for: Novel Binary Mixtures of Alkanolamine Based Deep Eutectic Solvents with Water—Thermodynamic Calculation and Correlation of Crucial Physicochemical Properties
Source: MDPI journal article supplement (doi:10.3390/molecules27030788), 2022-01-25
Supplement: s1 [file s1]

# **Novel binary mixtures of alkanolamine based deep eutectic solvents with water - thermodynamic calculation and correlation of crucial physicochemical properties**

Bartosz Nowosielski<sup>a</sup>, Marzena Jamrógiewicz<sup>b</sup>, Justyna Łuczak<sup>c</sup>, Dorota Warmińska<sup>a\*</sup>

<sup>a</sup> Department of Physical Chemistry, Faculty of Chemistry, Gdańsk University of Technology, ul. Narutowicza 11/12, 80-233 Gdańsk, POLAND

<sup>b</sup> Department of Physical Chemistry, Faculty of Pharmacy, Medical University of Gdańsk, Al. Gen. Hallera 107, 80-416 Gdańsk, POLAND

<sup>c</sup> Department of Process Engineering and Chemical Technology, Faculty of Chemistry, Gdańsk University of Technology, ul. Narutowicza 11/12, 80-233 Gdańsk, POLAND

\*Corresponding author: Tel.: +48583471410; fax: +48583472694,

E-mail address: [dorwarmi@pg.edu.pl](mailto:dorwarmi@pg.edu.pl)

Table S1. Densities  $\rho$ , excess molar volumes  $V_m^E$ , isobaric thermal expansion coefficients  $\alpha_p$ , excess thermal expansion  $\Delta\alpha_p$ , speeds of sound  $u$ , excess isentropic compressibilities  $k_S^E$ , viscosities  $\eta$ , viscosity deviations  $\Delta\eta$ , excess Gibbs free energy of activation of viscous flow  $\Delta G^{*E}$ , refractive indices  $n_D$ , refractive index deviations  $\Delta n_D$  as functions of mole fraction,  $x_1$  of DES for TBAB:AP (DES1) + water mixtures at the temperatures (293.15 to 303.15) K and atmospheric pressure.<sup>a</sup>

| $x_1$           | $\rho / \text{kg}\cdot\text{m}^{-3}$ | $10^6 V_m^E / \text{m}^3\cdot\text{mol}^{-1}$ | $10^4 \alpha_p / K^{-1}$ | $10^4 \Delta\alpha_p / K^{-1}$ | $u / \text{m}\cdot\text{s}^{-1}$ | $10^{10} k_S^E / \text{Pa}^{-1}$ | $\eta / \text{mPa}\cdot\text{s}$ | $\Delta\eta / \text{mPa}\cdot\text{s}$ | $\Delta G^{*E} / \text{J}\cdot\text{mol}^{-1}$ | $n_D$  | $\Delta n_D$ |
|-----------------|--------------------------------------|-----------------------------------------------|--------------------------|--------------------------------|----------------------------------|----------------------------------|----------------------------------|----------------------------------------|------------------------------------------------|--------|--------------|
| <b>293.15 K</b> |                                      |                                               |                          |                                |                                  |                                  |                                  |                                        |                                                |        |              |
| 0.0000          | 998.20                               | 0.000                                         | 2.119                    | 0.000                          | 1482.52                          | 0.000                            | 1.05                             | 0.000                                  | 0.00                                           | 1.3340 | 0.00000      |
| 0.0994          | 1022.32                              | -0.453                                        | 5.944                    | 1.742                          | 1767.38                          | -1.185                           | 6.47                             | 4.843                                  | 3874.91                                        | 1.3950 | 0.00413      |
| 0.1981          | 1032.09                              | -0.817                                        | 7.296                    | 2.057                          | 1811.29                          | -1.185                           | 18.21                            | 15.695                                 | 5585.67                                        | 1.4266 | 0.00742      |
| 0.2979          | 1033.23                              | -0.979                                        | 7.437                    | 1.569                          | 1796.62                          | -1.002                           | 33.67                            | 29.766                                 | 6123.90                                        | 1.4440 | 0.00764      |
| 0.3961          | 1031.40                              | -1.006                                        | 7.477                    | 1.196                          | 1772.86                          | -0.810                           | 49.46                            | 43.439                                 | 6022.89                                        | 1.4550 | 0.00736      |
| 0.4983          | 1028.66                              | -0.950                                        | 7.390                    | 0.802                          | 1748.67                          | -0.627                           | 60.74                            | 51.292                                 | 5373.26                                        | 1.4620 | 0.00599      |
| 0.5987          | 1025.68                              | -0.827                                        | 7.393                    | 0.581                          | 1727.08                          | -0.467                           | 75.12                            | 60.412                                 | 4709.86                                        | 1.4667 | 0.00456      |
| 0.6999          | 1022.93                              | -0.668                                        | 7.356                    | 0.368                          | 1707.97                          | -0.325                           | 85.40                            | 62.416                                 | 3790.44                                        | 1.4702 | 0.00326      |
| 0.8000          | 1020.02                              | -0.445                                        | 7.325                    | 0.198                          | 1688.58                          | -0.187                           | 93.99                            | 58.259                                 | 2775.90                                        | 1.4726 | 0.00187      |
| 0.9000          | 1017.55                              | -0.211                                        | 7.473                    | 0.233                          | 1675.64                          | -0.083                           | 96.45                            | 40.920                                 | 1565.90                                        | 1.4750 | 0.00118      |
| 1.0000          | 1015.71                              | 0.000                                         | 7.334                    | 0.000                          | 1666.29                          | 0.000                            | 86.30                            | 0.000                                  | 0.00                                           | 1.4764 | 0.00000      |
| <b>298.15 K</b> |                                      |                                               |                          |                                |                                  |                                  |                                  |                                        |                                                |        |              |
| 0.0000          | 997.05                               | 0.000                                         | 2.565                    | 0.000                          | 1496.8                           | 0.000                            | 0.90                             | 0.000                                  | 0.00                                           | 1.3331 | 0.00000      |
| 0.0994          | 1019.24                              | -0.432                                        | 6.110                    | 1.634                          | 1757.08                          | -1.113                           | 5.25                             | 3.879                                  | 3852.17                                        | 1.3937 | 0.00400      |
| 0.1981          | 1028.31                              | -0.784                                        | 7.376                    | 1.950                          | 1796.54                          | -1.131                           | 13.92                            | 11.837                                 | 5487.88                                        | 1.4250 | 0.00717      |
| 0.2979          | 1029.38                              | -0.947                                        | 7.517                    | 1.515                          | 1781.00                          | -0.965                           | 25.20                            | 22.023                                 | 6025.66                                        | 1.4423 | 0.00742      |
| 0.3961          | 1027.54                              | -0.978                                        | 7.530                    | 1.150                          | 1756.80                          | -0.783                           | 35.95                            | 31.134                                 | 5892.31                                        | 1.4532 | 0.00712      |
| 0.4983          | 1024.84                              | -0.928                                        | 7.451                    | 0.791                          | 1732.43                          | -0.609                           | 44.31                            | 36.886                                 | 5284.13                                        | 1.4601 | 0.00572      |
| 0.5987          | 1021.89                              | -0.809                                        | 7.432                    | 0.567                          | 1710.67                          | -0.454                           | 54.10                            | 42.745                                 | 4620.34                                        | 1.4649 | 0.00443      |
| 0.6999          | 1019.16                              | -0.655                                        | 7.397                    | 0.371                          | 1691.51                          | -0.317                           | 61.29                            | 43.856                                 | 3719.78                                        | 1.4684 | 0.00318      |
| 0.8000          | 1016.25                              | -0.434                                        | 7.331                    | 0.178                          | 1671.67                          | -0.181                           | 67.26                            | 40.626                                 | 2723.50                                        | 1.4708 | 0.00182      |
| 0.9000          | 1013.78                              | -0.203                                        | 7.457                    | 0.200                          | 1657.12                          | -0.072                           | 69.02                            | 28.345                                 | 1535.51                                        | 1.4731 | 0.00106      |
| 1.0000          | 1011.99                              | 0.000                                         | 7.343                    | 0.000                          | 1649.50                          | 0.000                            | 62.12                            | 0.000                                  | 0.00                                           | 1.4746 | 0.00000      |
| <b>303.15 K</b> |                                      |                                               |                          |                                |                                  |                                  |                                  |                                        |                                                |        |              |
| 0.0000          | 995.65                               | 0.000                                         | 3.010                    | 0.000                          | 1509.53                          | 0.000                            | 0.79                             | 0.000                                  | 0.00                                           | 1.3322 | 0.00000      |
| 0.0994          | 1016.09                              | -0.412                                        | 6.275                    | 1.526                          | 1746.66                          | -1.049                           | 4.39                             | 3.204                                  | 3835.67                                        | 1.3925 | 0.00394      |

|          |         |        |       |       |         |        |       |        |         |        |         |
|----------|---------|--------|-------|-------|---------|--------|-------|--------|---------|--------|---------|
| 0.1981   | 1024.50 | -0.752 | 7.456 | 1.844 | 1781.64 | -1.082 | 11.06 | 9.285  | 5408.30 | 1.4234 | 0.00687 |
| 0.2979   | 1025.50 | -0.918 | 7.597 | 1.463 | 1765.20 | -0.931 | 19.47 | 16.803 | 5921.86 | 1.4407 | 0.00723 |
| 0.3961   | 1023.66 | -0.951 | 7.583 | 1.105 | 1740.68 | -0.760 | 27.16 | 23.176 | 5766.31 | 1.4514 | 0.00680 |
| 0.4983   | 1021.02 | -0.906 | 7.513 | 0.781 | 1715.83 | -0.591 | 33.07 | 27.023 | 5155.10 | 1.4583 | 0.00546 |
| 0.5987   | 1018.09 | -0.792 | 7.471 | 0.553 | 1694.24 | -0.443 | 40.39 | 31.278 | 4518.31 | 1.4632 | 0.00433 |
| 0.6999   | 1015.39 | -0.642 | 7.438 | 0.374 | 1674.98 | -0.309 | 45.65 | 31.870 | 3634.30 | 1.4667 | 0.00310 |
| 0.8000   | 1012.58 | -0.433 | 7.336 | 0.157 | 1656.35 | -0.182 | 49.32 | 28.582 | 2618.91 | 1.4691 | 0.00178 |
| 0.9000   | 1009.99 | -0.193 | 7.441 | 0.168 | 1639.39 | -0.065 | 50.84 | 19.640 | 1459.93 | 1.4714 | 0.00104 |
| 1.0000   | 1008.28 | 0.000  | 7.351 | 0.000 | 1632.76 | 0.000  | 46.94 | 0.000  | 0.00    | 1.4729 | 0.00000 |
| <hr/>    |         |        |       |       |         |        |       |        |         |        |         |
| 308.15 K |         |        |       |       |         |        |       |        |         |        |         |
| 0.0000   | 994.03  | 0.000  | 3.455 | 0.000 | 1520.29 | 0.000  | 0.69  | 0.000  | 0.00    | 1.3314 | 0.00000 |
| 0.0994   | 1012.87 | -0.393 | 6.441 | 1.420 | 1736.11 | -0.992 | 3.72  | 2.698  | 3859.25 | 1.3913 | 0.00388 |
| 0.1981   | 1020.68 | -0.723 | 7.536 | 1.738 | 1766.28 | -1.038 | 8.96  | 7.451  | 5377.72 | 1.4217 | 0.00650 |
| 0.2979   | 1021.59 | -0.888 | 7.677 | 1.410 | 1749.37 | -0.901 | 15.33 | 13.092 | 5860.90 | 1.4389 | 0.00689 |
| 0.3961   | 1019.77 | -0.925 | 7.636 | 1.060 | 1724.41 | -0.739 | 21.05 | 17.752 | 5695.79 | 1.4495 | 0.00646 |
| 0.4983   | 1017.18 | -0.885 | 7.575 | 0.771 | 1699.51 | -0.578 | 25.34 | 20.402 | 5080.02 | 1.4565 | 0.00528 |
| 0.5987   | 1014.28 | -0.775 | 7.511 | 0.540 | 1677.87 | -0.434 | 30.69 | 23.349 | 4445.32 | 1.4614 | 0.00420 |
| 0.6999   | 1011.61 | -0.629 | 7.479 | 0.378 | 1658.56 | -0.304 | 34.65 | 23.700 | 3578.47 | 1.4649 | 0.00302 |
| 0.8000   | 1008.85 | -0.426 | 7.342 | 0.137 | 1638.97 | -0.175 | 38.32 | 22.062 | 2640.15 | 1.4672 | 0.00163 |
| 0.9000   | 1006.24 | -0.185 | 7.425 | 0.136 | 1622.30 | -0.061 | 39.70 | 15.568 | 1509.07 | 1.4695 | 0.00091 |
| 1.0000   | 1004.58 | 0.000  | 7.359 | 0.000 | 1615.89 | 0.000  | 35.82 | 0.000  | 0.00    | 1.4711 | 0.00000 |
| <hr/>    |         |        |       |       |         |        |       |        |         |        |         |
| 313.15 K |         |        |       |       |         |        |       |        |         |        |         |
| 0.0000   | 992.22  | 0.000  | 3.901 | 0.000 | 1529.42 | 0.000  | 0.61  | 0.000  | 0.00    | 1.3305 | 0.00000 |
| 0.0994   | 1009.57 | -0.375 | 6.607 | 1.314 | 1725.05 | -0.940 | 3.16  | 2.268  | 3853.31 | 1.3900 | 0.00386 |
| 0.1981   | 1016.81 | -0.695 | 7.616 | 1.634 | 1751.15 | -0.998 | 7.44  | 6.138  | 5370.01 | 1.4199 | 0.00620 |
| 0.2979   | 1017.65 | -0.86  | 7.757 | 1.359 | 1733.12 | -0.873 | 12.36 | 10.454 | 5816.30 | 1.4370 | 0.00663 |
| 0.3961   | 1015.87 | -0.900 | 7.688 | 1.016 | 1708.21 | -0.719 | 16.53 | 13.754 | 5611.03 | 1.4475 | 0.00619 |
| 0.4983   | 1013.31 | -0.864 | 7.636 | 0.761 | 1683.20 | -0.564 | 19.63 | 15.526 | 4982.33 | 1.4545 | 0.00510 |
| 0.5987   | 1010.47 | -0.758 | 7.550 | 0.526 | 1661.22 | -0.424 | 23.86 | 17.835 | 4378.55 | 1.4595 | 0.00417 |
| 0.6999   | 1007.82 | -0.616 | 7.520 | 0.381 | 1642.16 | -0.298 | 26.82 | 17.945 | 3518.32 | 1.4629 | 0.00293 |
| 0.8000   | 1005.15 | -0.421 | 7.347 | 0.116 | 1621.35 | -0.166 | 29.92 | 16.906 | 2619.11 | 1.4652 | 0.00157 |
| 0.9000   | 1002.53 | -0.181 | 7.409 | 0.104 | 1605.15 | -0.055 | 31.17 | 12.091 | 1516.01 | 1.4675 | 0.00089 |
| 1.0000   | 1000.89 | 0.000  | 7.368 | 0.000 | 1599.37 | 0.000  | 27.97 | 0.000  | 0.00    | 1.4691 | 0.00000 |

<sup>a</sup> Standard uncertainties  $u$  are:  $u(T)$  = 0.01 K for density, speed of sound and viscosity and  $u(T)$  = 0.1 K for refractive index,  $u(p)$  = 10 kPa,  $u(x_1)$  =  $1 \cdot 10^{-4}$ ,  $u(\rho)$  = 0.035 kg·m<sup>-3</sup>,  $u(u)$  = 0.2 m·s<sup>-1</sup>,  $u_r(\eta)$  = 1% ,  $u(n_D)$  = 0.0002

Table S2. Densities  $\rho$ , excess molar volumes  $V^E$ , isobaric thermal expansion coefficients  $\alpha_p$ , excess thermal expansion  $\Delta\alpha_p$ , speeds of sound  $u$ , excess isentropic compressibilities  $k_S^E$ , viscosities  $\eta$ , viscosity deviations  $\Delta\eta$ , excess Gibbs free energy of activation of viscous flow  $\Delta G^{*E}$ , refractive indices  $n_D$ , refractive index deviations  $\Delta n_D$  as functions of mole fraction,  $x_1$  of DES for TBAC:AP (DES2) + water mixtures at the temperatures (293.15 to 303.15) K and atmospheric pressure.<sup>a</sup>

| $x_1$    | $\rho / \text{kg}\cdot\text{m}^{-3}$ | $10^6 V_m^E / \text{m}^3\cdot\text{mol}^{-1}$ | $10^4 \alpha_p / \text{K}^{-1}$ | $10^4 \Delta\alpha_p / \text{K}^{-1}$ | $u / \text{m}\cdot\text{s}^{-1}$ | $10^{10} k_S^E / \text{Pa}^{-1}$ | $\eta / \text{mPa}\cdot\text{s}$ | $\Delta\eta / \text{mPa}\cdot\text{s}$ | $\Delta G^{*E} / \text{J}\cdot\text{mol}^{-1}$ | $n_D$  | $\Delta n_D$ |
|----------|--------------------------------------|-----------------------------------------------|---------------------------------|---------------------------------------|----------------------------------|----------------------------------|----------------------------------|----------------------------------------|------------------------------------------------|--------|--------------|
| 293.15 K |                                      |                                               |                                 |                                       |                                  |                                  |                                  |                                        |                                                |        |              |
| 0.0000   | 998.20                               | 0.000                                         | 2.134                           | 0.000                                 | 1482.52                          | 0.000                            | 1.05                             | 0.000                                  | 0.00                                           | 1.3340 | 0.00000      |
| 0.0982   | 1004.94                              | -0.488                                        | 6.083                           | 1.915                                 | 1788.22                          | -1.229                           | 6.29                             | 4.683                                  | 3813.83                                        | 1.3935 | 0.00580      |
| 0.1964   | 1004.60                              | -0.843                                        | 7.265                           | 2.062                                 | 1843.38                          | -1.243                           | 17.39                            | 14.929                                 | 5494.35                                        | 1.4225 | 0.00759      |
| 0.2947   | 999.85                               | -1.002                                        | 7.469                           | 1.642                                 | 1831.12                          | -1.056                           | 30.98                            | 27.194                                 | 5968.10                                        | 1.4392 | 0.00784      |
| 0.3943   | 994.14                               | -1.032                                        | 7.437                           | 1.188                                 | 1808.34                          | -0.856                           | 44.48                            | 38.604                                 | 5810.89                                        | 1.4494 | 0.00690      |
| 0.4899   | 988.81                               | -0.974                                        | 7.407                           | 0.866                                 | 1785.23                          | -0.674                           | 56.32                            | 47.277                                 | 5324.20                                        | 1.4563 | 0.00612      |
| 0.5921   | 983.76                               | -0.855                                        | 7.360                           | 0.586                                 | 1763.55                          | -0.504                           | 65.59                            | 51.626                                 | 4507.89                                        | 1.4613 | 0.00496      |
| 0.6905   | 979.41                               | -0.692                                        | 7.359                           | 0.411                                 | 1744.52                          | -0.356                           | 71.07                            | 48.982                                 | 3522.16                                        | 1.4651 | 0.00416      |
| 0.7946   | 975.37                               | -0.483                                        | 7.351                           | 0.255                                 | 1727.25                          | -0.220                           | 77.89                            | 44.519                                 | 2461.07                                        | 1.4679 | 0.00308      |
| 0.8959   | 971.90                               | -0.250                                        | 7.307                           | 0.095                                 | 1713.19                          | -0.105                           | 85.81                            | 33.748                                 | 1421.25                                        | 1.4698 | 0.00191      |
| 1.0000   | 968.86                               | 0.000                                         | 7.305                           | 0.000                                 | 1700.32                          | 0.000                            | 82.77                            | 0.000                                  | 0.00                                           | 1.4705 | 0.00000      |
| 298.15 K |                                      |                                               |                                 |                                       |                                  |                                  |                                  |                                        |                                                |        |              |
| 0.0000   | 997.04                               | 0.000                                         | 2.575                           | 0.000                                 | 1496.80                          | 0.000                            | 0.90                             | 0.000                                  | 0.00                                           | 1.3331 | 0.00000      |
| 0.0982   | 1001.83                              | -0.464                                        | 6.192                           | 1.750                                 | 1778.69                          | -1.161                           | 5.06                             | 3.705                                  | 3767.13                                        | 1.3921 | 0.00550      |
| 0.1964   | 1000.91                              | -0.809                                        | 7.344                           | 1.953                                 | 1827.99                          | -1.188                           | 13.34                            | 11.299                                 | 5400.17                                        | 1.4210 | 0.00733      |
| 0.2947   | 996.10                               | -0.970                                        | 7.544                           | 1.581                                 | 1814.97                          | -1.019                           | 23.10                            | 20.014                                 | 5853.61                                        | 1.4376 | 0.00757      |
| 0.3943   | 990.43                               | -1.005                                        | 7.508                           | 1.158                                 | 1791.82                          | -0.829                           | 32.34                            | 27.631                                 | 5672.78                                        | 1.4478 | 0.00670      |
| 0.4899   | 985.13                               | -0.951                                        | 7.468                           | 0.852                                 | 1768.62                          | -0.656                           | 40.43                            | 33.305                                 | 5186.02                                        | 1.4545 | 0.00577      |
| 0.5921   | 980.13                               | -0.838                                        | 7.410                           | 0.580                                 | 1742.83                          | -0.476                           | 47.04                            | 36.223                                 | 4395.99                                        | 1.4594 | 0.00455      |
| 0.6905   | 975.80                               | -0.678                                        | 7.396                           | 0.406                                 | 1727.69                          | -0.349                           | 51.46                            | 34.653                                 | 3457.91                                        | 1.4631 | 0.00369      |
| 0.7946   | 971.78                               | -0.473                                        | 7.371                           | 0.248                                 | 1710.02                          | -0.215                           | 56.44                            | 31.454                                 | 2424.21                                        | 1.4661 | 0.00284      |
| 0.8959   | 968.35                               | -0.247                                        | 7.327                           | 0.097                                 | 1695.62                          | -0.102                           | 62.41                            | 24.102                                 | 1418.02                                        | 1.4680 | 0.00169      |
| 1.0000   | 965.32                               | 0.000                                         | 7.315                           | 0.000                                 | 1682.88                          | 0.000                            | 59.81                            | 0.000                                  | 0.00                                           | 1.4689 | 0.00000      |
| 303.15 K |                                      |                                               |                                 |                                       |                                  |                                  |                                  |                                        |                                                |        |              |
| 0.0000   | 995.65                               | 0.000                                         | 3.016                           | 0.000                                 | 1509.53                          | 0.000                            | 0.79                             | 0.000                                  | 0.00                                           | 1.3322 | 0.00000      |
| 0.0982   | 998.74                               | -0.444                                        | 6.301                           | 1.585                                 | 1768.06                          | -1.095                           | 4.20                             | 3.029                                  | 3732.44                                        | 1.3907 | 0.00528      |
| 0.1964   | 997.19                               | -0.777                                        | 7.422                           | 1.844                                 | 1812.73                          | -1.138                           | 10.64                            | 8.903                                  | 5333.74                                        | 1.4194 | 0.00709      |

|          |        |        |       |       |         |        |       |        |         |        |         |
|----------|--------|--------|-------|-------|---------|--------|-------|--------|---------|--------|---------|
| 0.2947   | 992.34 | -0.939 | 7.618 | 1.520 | 1798.92 | -0.984 | 17.89 | 15.305 | 5758.47 | 1.4357 | 0.00715 |
| 0.3943   | 986.70 | -0.978 | 7.578 | 1.129 | 1775.40 | -0.805 | 24.43 | 20.548 | 5550.79 | 1.4460 | 0.00647 |
| 0.4899   | 981.45 | -0.928 | 7.529 | 0.838 | 1751.99 | -0.638 | 30.08 | 24.297 | 5055.75 | 1.4527 | 0.00560 |
| 0.5921   | 976.49 | -0.820 | 7.460 | 0.575 | 1726.03 | -0.463 | 35.17 | 26.529 | 4305.18 | 1.4576 | 0.00443 |
| 0.6905   | 972.20 | -0.664 | 7.432 | 0.402 | 1710.85 | -0.341 | 38.66 | 25.456 | 3402.54 | 1.4612 | 0.00351 |
| 0.7946   | 968.20 | -0.463 | 7.392 | 0.241 | 1693.30 | -0.211 | 42.88 | 23.544 | 2420.68 | 1.4640 | 0.00249 |
| 0.8959   | 964.81 | -0.242 | 7.348 | 0.100 | 1678.51 | -0.099 | 47.33 | 18.160 | 1433.04 | 1.4658 | 0.00127 |
| 1.0000   | 961.80 | 0.000  | 7.325 | 0.000 | 1665.99 | 0.000  | 44.78 | 0.000  | 0.00    | 1.4671 | 0.00000 |
| <hr/>    |        |        |       |       |         |        |       |        |         |        |         |
| 308.15 K |        |        |       |       |         |        |       |        |         |        |         |
| 0.0000   | 994.03 | 0.000  | 3.457 | 0.000 | 1520.29 | 0.000  | 0.69  | 0.000  | 0.00    | 1.3314 | 0.00000 |
| 0.0982   | 995.58 | -0.425 | 6.410 | 1.421 | 1757.38 | -1.039 | 3.67  | 2.661  | 3828.70 | 1.3897 | 0.00505 |
| 0.1964   | 993.45 | -0.747 | 7.500 | 1.735 | 1797.30 | -1.094 | 8.70  | 7.222  | 5322.88 | 1.4184 | 0.00688 |
| 0.2947   | 988.55 | -0.909 | 7.693 | 1.460 | 1782.62 | -0.953 | 14.2  | 12.029 | 5713.07 | 1.4347 | 0.00696 |
| 0.3943   | 982.95 | -0.951 | 7.648 | 1.100 | 1758.52 | -0.782 | 18.92 | 15.703 | 5472.45 | 1.4448 | 0.00610 |
| 0.4899   | 977.75 | -0.906 | 7.590 | 0.824 | 1735.23 | -0.623 | 23.22 | 18.491 | 4993.20 | 1.4515 | 0.00525 |
| 0.5921   | 972.85 | -0.802 | 7.510 | 0.570 | 1708.88 | -0.451 | 27.45 | 20.476 | 4292.79 | 1.4563 | 0.00399 |
| 0.6905   | 968.58 | -0.650 | 7.468 | 0.398 | 1693.99 | -0.334 | 30.54 | 20.032 | 3439.23 | 1.4599 | 0.00308 |
| 0.7946   | 964.63 | -0.454 | 7.413 | 0.234 | 1676.43 | -0.207 | 33.23 | 18.034 | 2427.03 | 1.4627 | 0.00207 |
| 0.8959   | 961.26 | -0.238 | 7.368 | 0.102 | 1661.65 | -0.098 | 35.89 | 13.275 | 1401.48 | 1.4646 | 0.00096 |
| 1.0000   | 958.28 | 0.000  | 7.336 | 0.000 | 1648.89 | 0.000  | 34.23 | 0.000  | 0.00    | 1.4662 | 0.00000 |
| <hr/>    |        |        |       |       |         |        |       |        |         |        |         |
| 313.15 K |        |        |       |       |         |        |       |        |         |        |         |
| 0.0000   | 992.21 | 0.000  | 3.898 | 0.000 | 1529.42 | 0.000  | 0.61  | 0.000  | 0.00    | 1.3305 | 0.00000 |
| 0.0982   | 992.34 | -0.408 | 6.519 | 1.258 | 1746.33 | -0.987 | 3.14  | 2.259  | 3841.10 | 1.3882 | 0.00483 |
| 0.1964   | 989.68 | -0.718 | 7.578 | 1.627 | 1781.41 | -1.052 | 7.43  | 6.156  | 5388.88 | 1.4167 | 0.00667 |
| 0.2947   | 984.73 | -0.880 | 7.767 | 1.401 | 1766.25 | -0.925 | 11.33 | 9.482  | 5642.12 | 1.4328 | 0.00670 |
| 0.3943   | 979.18 | -0.926 | 7.718 | 1.071 | 1741.86 | -0.762 | 15.00 | 12.297 | 5412.64 | 1.4428 | 0.00584 |
| 0.4899   | 974.03 | -0.883 | 7.651 | 0.811 | 1718.48 | -0.609 | 17.74 | 13.816 | 4860.83 | 1.4495 | 0.00506 |
| 0.5921   | 969.19 | -0.785 | 7.560 | 0.566 | 1692.08 | -0.441 | 21.26 | 15.547 | 4218.20 | 1.4543 | 0.00386 |
| 0.6905   | 964.96 | -0.637 | 7.504 | 0.394 | 1676.87 | -0.327 | 24.19 | 15.697 | 3441.56 | 1.4577 | 0.00279 |
| 0.7946   | 961.05 | -0.445 | 7.434 | 0.227 | 1659.64 | -0.204 | 26.42 | 14.286 | 2456.99 | 1.4604 | 0.00172 |
| 0.8959   | 957.72 | -0.233 | 7.389 | 0.104 | 1644.80 | -0.096 | 28.01 | 10.187 | 1399.79 | 1.4623 | 0.00064 |
| 1.0000   | 954.77 | 0.000  | 7.346 | 0.000 | 1631.99 | 0.000  | 26.61 | 0.000  | 0.00    | 1.4642 | 0.00000 |

<sup>a</sup> Standard uncertainties  $u$  are:  $u(T)$  = 0.01 K for density, speed of sound and viscosity and  $u(T)$  = 0.1 K for refractive index,  $u(p)$  = 10 kPa,  $u(x_1)$  =  $1 \cdot 10^{-4}$ ,  $u(\rho)$  = 0.035 kg·m<sup>-3</sup>,  $u(u)$  = 0.2 m·s<sup>-1</sup>,  $u_r(\eta)$  = 1% ,  $u(n_D)$  = 0.0002

Table S3. Densities  $\rho$ , excess molar volumes  $V_m^E$ , isobaric thermal expansion coefficients  $\alpha_p$ , excess thermal expansion  $\Delta\alpha_p$ , speed of sounds  $u$ , excess isentropic compressibilities  $k_S^E$ , viscosities  $\eta$ , viscosity deviations  $\Delta\eta$ , excess Gibbs free energy of activation of viscous flow  $\Delta G^{*E}$ , refractive indices  $n_D$ , refractive index deviations  $\Delta n_D$  as functions of mole fraction,  $x_1$  of DES for TBAB:MAE (DES3) + water mixtures at the temperatures (293.15 to 303.15) K and atmospheric pressure. <sup>a</sup>

| $x_1$           | $\rho / \text{kg}\cdot\text{m}^{-3}$ | $10^6 V_m^E / \text{m}^3\cdot\text{mol}^{-1}$ | $10^4 \alpha_p / \text{K}^{-1}$ | $10^4 \Delta\alpha_p / \text{K}^{-1}$ | $u / \text{m}\cdot\text{s}^{-1}$ | $10^{10} k_S^E / \text{Pa}^{-1}$ | $\eta / \text{mPa}\cdot\text{s}$ | $\Delta\eta / \text{mPa}\cdot\text{s}$ | $\Delta G^{*E} / \text{J}\cdot\text{mol}^{-1}$ | $n_D$  | $\Delta n_D$ |
|-----------------|--------------------------------------|-----------------------------------------------|---------------------------------|---------------------------------------|----------------------------------|----------------------------------|----------------------------------|----------------------------------------|------------------------------------------------|--------|--------------|
| <b>293.15 K</b> |                                      |                                               |                                 |                                       |                                  |                                  |                                  |                                        |                                                |        |              |
| 0.0000          | 998.20                               | 0.000                                         | 2.119                           | 0.000                                 | 1482.52                          | 0.000                            | 1.05                             | 0.000                                  | 0.00                                           | 1.3340 | 0.00000      |
| 0.0978          | 1016.19                              | -0.617                                        | 6.186                           | 1.965                                 | 1738.92                          | -1.463                           | 6.76                             | 5.235                                  | 4147.73                                        | 1.3921 | 0.00631      |
| 0.1982          | 1018.89                              | -1.017                                        | 7.364                           | 2.083                                 | 1731.41                          | -1.462                           | 18.26                            | 16.039                                 | 5912.10                                        | 1.4208 | 0.00888      |
| 0.2957          | 1014.71                              | -1.155                                        | 7.383                           | 1.489                                 | 1686.27                          | -1.251                           | 28.68                            | 25.463                                 | 6229.61                                        | 1.4360 | 0.00899      |
| 0.3970          | 1009.27                              | -1.159                                        | 7.375                           | 1.060                                 | 1641.46                          | -1.009                           | 39.11                            | 34.394                                 | 6071.66                                        | 1.4452 | 0.00780      |
| 0.4958          | 1004.09                              | -1.072                                        | 7.323                           | 0.716                                 | 1604.42                          | -0.786                           | 45.73                            | 38.886                                 | 5492.02                                        | 1.4506 | 0.00602      |
| 0.5935          | 999.33                               | -0.917                                        | 7.280                           | 0.457                                 | 1574.10                          | -0.587                           | 50.05                            | 40.149                                 | 4711.38                                        | 1.4543 | 0.00439      |
| 0.6956          | 995.01                               | -0.713                                        | 7.264                           | 0.266                                 | 1548.23                          | -0.404                           | 51.50                            | 36.934                                 | 3692.97                                        | 1.4572 | 0.00298      |
| 0.7979          | 991.43                               | -0.494                                        | 7.279                           | 0.141                                 | 1527.38                          | -0.248                           | 51.65                            | 30.199                                 | 2575.62                                        | 1.4594 | 0.00175      |
| 0.8940          | 988.31                               | -0.248                                        | 7.301                           | 0.057                                 | 1510.73                          | -0.117                           | 51.65                            | 20.805                                 | 1495.23                                        | 1.4613 | 0.00101      |
| 1.0000          | 985.67                               | 0.000                                         | 7.342                           | 0.000                                 | 1496.77                          | 0.000                            | 46.05                            | 0.000                                  | 0.00                                           | 1.4627 | 0.00000      |
| <b>298.15 K</b> |                                      |                                               |                                 |                                       |                                  |                                  |                                  |                                        |                                                |        |              |
| 0.0000          | 997.05                               | 0.000                                         | 2.565                           | 0.000                                 | 1496.80                          | 0.000                            | 0.90                             | 0.000                                  | 0.00                                           | 1.3331 | 0.00000      |
| 0.0978          | 1013.00                              | -0.593                                        | 6.341                           | 1.839                                 | 1727.94                          | -1.399                           | 5.35                             | 4.064                                  | 4059.50                                        | 1.3905 | 0.00598      |
| 0.1982          | 1015.12                              | -0.984                                        | 7.459                           | 1.981                                 | 1717.11                          | -1.420                           | 13.77                            | 11.911                                 | 5765.79                                        | 1.4190 | 0.00853      |
| 0.2957          | 1010.94                              | -1.125                                        | 7.483                           | 1.441                                 | 1671.56                          | -1.224                           | 21.14                            | 18.495                                 | 6065.45                                        | 1.4342 | 0.00874      |
| 0.3970          | 1005.53                              | -1.135                                        | 7.465                           | 1.036                                 | 1626.62                          | -0.992                           | 28.75                            | 24.922                                 | 5931.15                                        | 1.4433 | 0.00752      |
| 0.4958          | 1000.40                              | -1.053                                        | 7.403                           | 0.706                                 | 1589.56                          | -0.776                           | 33.30                            | 27.813                                 | 5350.14                                        | 1.4487 | 0.00579      |
| 0.5935          | 995.67                               | -0.903                                        | 7.355                           | 0.459                                 | 1559.06                          | -0.580                           | 36.52                            | 28.685                                 | 4593.14                                        | 1.4524 | 0.00420      |
| 0.6956          | 991.38                               | -0.705                                        | 7.327                           | 0.271                                 | 1533.11                          | -0.401                           | 38.12                            | 26.751                                 | 3626.27                                        | 1.4553 | 0.00282      |
| 0.7979          | 987.82                               | -0.490                                        | 7.331                           | 0.146                                 | 1512.16                          | -0.246                           | 38.33                            | 21.820                                 | 2530.01                                        | 1.4575 | 0.00161      |
| 0.8940          | 984.70                               | -0.247                                        | 7.344                           | 0.062                                 | 1495.39                          | -0.116                           | 38.31                            | 14.869                                 | 1461.16                                        | 1.4594 | 0.00089      |
| 1.0000          | 982.05                               | 0.000                                         | 7.372                           | 0.000                                 | 1481.33                          | 0.000                            | 34.50                            | 0.000                                  | 0.00                                           | 1.4609 | 0.00000      |
| <b>303.15 K</b> |                                      |                                               |                                 |                                       |                                  |                                  |                                  |                                        |                                                |        |              |
| 0.0000          | 994.03                               | 0.000                                         | 3.010                           | 0.000                                 | 1509.53                          | 0.000                            | 0.79                             | 0.000                                  | 0.00                                           | 1.3322 | 0.00000      |
| 0.0978          | 1006.45                              | -0.571                                        | 6.496                           | 1.713                                 | 1716.80                          | -1.341                           | 4.42                             | 3.300                                  | 4006.30                                        | 1.3889 | 0.00568      |
| 0.1982          | 1007.48                              | -0.952                                        | 7.555                           | 1.880                                 | 1702.63                          | -1.382                           | 10.86                            | 9.267                                  | 5658.63                                        | 1.4172 | 0.00823      |

|          |         |        |       |       |         |        |       |        |         |        |         |
|----------|---------|--------|-------|-------|---------|--------|-------|--------|---------|--------|---------|
| 0.2957   | 1003.31 | -1.097 | 7.582 | 1.394 | 1656.36 | -1.200 | 16.31 | 14.066 | 5937.07 | 1.4323 | 0.00846 |
| 0.3970   | 997.97  | -1.110 | 7.556 | 1.013 | 1611.59 | -0.978 | 21.90 | 18.700 | 5799.91 | 1.4414 | 0.00732 |
| 0.4958   | 992.94  | -1.034 | 7.484 | 0.697 | 1574.83 | -0.769 | 25.07 | 20.533 | 5209.02 | 1.4467 | 0.00555 |
| 0.5935   | 988.31  | -0.889 | 7.430 | 0.462 | 1543.96 | -0.575 | 27.41 | 21.017 | 4461.74 | 1.4504 | 0.00400 |
| 0.6956   | 984.08  | -0.696 | 7.391 | 0.276 | 1517.78 | -0.397 | 28.15 | 18.988 | 3468.73 | 1.4533 | 0.00265 |
| 0.7979   | 980.55  | -0.484 | 7.383 | 0.152 | 1496.98 | -0.245 | 28.83 | 15.692 | 2431.52 | 1.4555 | 0.00147 |
| 0.8940   | 977.46  | -0.244 | 7.387 | 0.066 | 1480.08 | -0.115 | 29.47 | 11.036 | 1430.64 | 1.4574 | 0.00078 |
| 1.0000   | 974.81  | 0.000  | 7.403 | 0.000 | 1465.91 | 0.000  | 26.78 | 0.000  | 0.00    | 1.4590 | 0.00000 |
| <hr/>    |         |        |       |       |         |        |       |        |         |        |         |
| 308.15 K |         |        |       |       |         |        |       |        |         |        |         |
| 0.0000   | 994.03  | 0.000  | 3.455 | 0.000 | 1520.29 | 0.000  | 0.69  | 0.000  | 0.00    | 1.3314 | 0.00000 |
| 0.0978   | 1006.45 | -0.550 | 6.651 | 1.588 | 1705.28 | -1.291 | 3.73  | 2.761  | 4013.42 | 1.3876 | 0.00542 |
| 0.1982   | 1007.48 | -0.922 | 7.650 | 1.780 | 1688.00 | -1.349 | 8.78  | 7.421  | 5612.26 | 1.4157 | 0.00790 |
| 0.2957   | 1003.31 | -1.069 | 7.682 | 1.347 | 1641.36 | -1.180 | 12.76 | 10.858 | 5835.10 | 1.4308 | 0.00819 |
| 0.3970   | 997.97  | -1.087 | 7.646 | 0.990 | 1596.47 | -0.967 | 17.17 | 14.483 | 5726.92 | 1.4399 | 0.00711 |
| 0.4958   | 992.94  | -1.016 | 7.564 | 0.688 | 1559.75 | -0.763 | 20.22 | 16.460 | 5225.68 | 1.4452 | 0.00536 |
| 0.5935   | 988.31  | -0.875 | 7.505 | 0.465 | 1528.83 | -0.571 | 21.73 | 16.479 | 4446.77 | 1.4489 | 0.00384 |
| 0.6956   | 984.08  | -0.686 | 7.454 | 0.281 | 1502.71 | -0.395 | 22.37 | 14.924 | 3469.99 | 1.4518 | 0.00251 |
| 0.7979   | 980.55  | -0.478 | 7.435 | 0.157 | 1481.63 | -0.243 | 22.88 | 12.315 | 2438.83 | 1.4540 | 0.00135 |
| 0.8940   | 977.46  | -0.241 | 7.430 | 0.071 | 1464.88 | -0.115 | 23.35 | 8.673  | 1442.26 | 1.4559 | 0.00066 |
| 1.0000   | 974.81  | 0.000  | 7.433 | 0.000 | 1450.59 | 0.000  | 21.09 | 0.000  | 0.00    | 1.4576 | 0.00000 |
| <hr/>    |         |        |       |       |         |        |       |        |         |        |         |
| 313.15 K |         |        |       |       |         |        |       |        |         |        |         |
| 0.0000   | 992.22  | 0.000  | 3.901 | 0.000 | 1529.42 | 0.000  | 0.61  | 0.000  | 0.00    | 1.3305 | 0.00000 |
| 0.0978   | 1003.07 | -0.531 | 6.806 | 1.464 | 1693.90 | -1.247 | 3.18  | 2.331  | 4011.77 | 1.3861 | 0.00518 |
| 0.1982   | 1003.61 | -0.893 | 7.746 | 1.681 | 1672.92 | -1.319 | 7.25  | 6.072  | 5580.17 | 1.4140 | 0.00764 |
| 0.2957   | 999.43  | -1.043 | 7.782 | 1.300 | 1626.16 | -1.163 | 10.25 | 8.616  | 5758.91 | 1.4289 | 0.00784 |
| 0.3970   | 994.13  | -1.063 | 7.736 | 0.968 | 1581.28 | -0.957 | 13.63 | 11.349 | 5644.25 | 1.4381 | 0.00693 |
| 0.4958   | 989.17  | -0.997 | 7.645 | 0.679 | 1544.61 | -0.757 | 15.94 | 12.772 | 5140.47 | 1.4433 | 0.00514 |
| 0.5935   | 984.58  | -0.861 | 7.580 | 0.468 | 1514.04 | -0.570 | 17.07 | 12.688 | 4363.91 | 1.4470 | 0.00365 |
| 0.6956   | 980.41  | -0.677 | 7.517 | 0.286 | 1487.62 | -0.394 | 17.33 | 11.178 | 3360.36 | 1.4499 | 0.00235 |
| 0.7979   | 976.90  | -0.473 | 7.487 | 0.163 | 1466.54 | -0.243 | 17.86 | 9.218  | 2357.62 | 1.4521 | 0.00121 |
| 0.8940   | 973.82  | -0.238 | 7.473 | 0.076 | 1449.56 | -0.113 | 18.17 | 6.276  | 1360.62 | 1.4540 | 0.00055 |
| 1.0000   | 971.19  | 0.000  | 7.463 | 0.000 | 1435.41 | 0.000  | 16.92 | 0.000  | 0.00    | 1.4558 | 0.00000 |

<sup>a</sup> Standard uncertainties u are:  $u(T)$  = 0.01 K for density, speed of sound and viscosity and  $u(T)$  = 0.1 K for refractive index,  $u(p)$  = 10 kPa,  $u(x_1)$  =  $1 \cdot 10^{-4}$ ,  $u(\rho)$  = 0.035 kg·m<sup>-3</sup>,  $u(u)$  = 0.2 m·s<sup>-1</sup>,  $u_r(\eta)$  = 1% ,  $u(n_D)$  = 0.0002

Table S4. Densities  $\rho$ , excess molar volumes  $V_m^E$ , isobaric thermal expansion coefficients  $\alpha_p$ , excess thermal expansion  $\Delta\alpha_p$ , speed of sound  $u$ , excess isentropic compressibilities  $k_s^E$ , viscosities  $\eta$ , viscosity deviations  $\Delta\eta$ , excess Gibbs free energy of activation of viscous flow  $\Delta G^{*E}$ , refractive indices  $n_D$ , refractive index deviations  $\Delta n_D$  as functions of mole fraction,  $x_1$  of DES for TBAB:BAE (DES4) + water mixtures at the temperatures (293.15 to 303.15) K and atmospheric pressure. <sup>a</sup>

| $x_1$           | $\rho / \text{kg}\cdot\text{m}^{-3}$ | $10^6 V_m^E / \text{m}^3\cdot\text{mol}^{-1}$ | $10^4 \alpha_p / \text{K}^{-1}$ | $10^4 \Delta\alpha_p / \text{K}^{-1}$ | $u / \text{m}\cdot\text{s}^{-1}$ | $10^{10} k_s^E / \text{Pa}^{-1}$ | $\eta / \text{mPa}\cdot\text{s}$ | $\Delta\eta / \text{mPa}\cdot\text{s}$ | $\Delta G^{*E} / \text{J}\cdot\text{mol}^{-1}$ | $n_D$  | $\Delta n_D$ |
|-----------------|--------------------------------------|-----------------------------------------------|---------------------------------|---------------------------------------|----------------------------------|----------------------------------|----------------------------------|----------------------------------------|------------------------------------------------|--------|--------------|
| <b>293.15 K</b> |                                      |                                               |                                 |                                       |                                  |                                  |                                  |                                        |                                                |        |              |
| 0.0000          | 998.20                               | 0.000                                         | 2.119                           | 0.000                                 | 1482.52                          | 0.000                            | 1.05                             | 0.000                                  | 0.00                                           | 1.334  | 0.00000      |
| 0.0975          | 987.04                               | -0.583                                        | 6.633                           | 1.805                                 | 1605.54                          | -1.196                           | 8.64                             | 7.086                                  | 4982.17                                        | 1.3999 | 0.00554      |
| 0.1951          | 976.01                               | -0.879                                        | 7.459                           | 1.543                                 | 1580.95                          | -1.160                           | 20.06                            | 17.758                                 | 6430.49                                        | 1.4261 | 0.00750      |
| 0.2936          | 967.54                               | -1.030                                        | 7.684                           | 1.177                                 | 1548.49                          | -0.980                           | 33.26                            | 29.838                                 | 6827.16                                        | 1.4391 | 0.00735      |
| 0.3943          | 960.63                               | -1.069                                        | 7.754                           | 0.874                                 | 1521.14                          | -0.791                           | 46.71                            | 41.580                                 | 6664.02                                        | 1.4464 | 0.00631      |
| 0.4930          | 955.07                               | -1.019                                        | 7.753                           | 0.624                                 | 1499.17                          | -0.620                           | 54.37                            | 46.739                                 | 5974.18                                        | 1.4509 | 0.00525      |
| 0.5925          | 950.31                               | -0.896                                        | 7.738                           | 0.426                                 | 1480.24                          | -0.461                           | 60.92                            | 49.533                                 | 5120.29                                        | 1.4537 | 0.00399      |
| 0.6975          | 946.07                               | -0.708                                        | 7.726                           | 0.269                                 | 1463.88                          | -0.314                           | 62.40                            | 45.023                                 | 3933.83                                        | 1.4558 | 0.00286      |
| 0.7920          | 942.81                               | -0.502                                        | 7.731                           | 0.171                                 | 1451.18                          | -0.196                           | 62.48                            | 37.068                                 | 2782.20                                        | 1.4573 | 0.00208      |
| 0.8938          | 939.77                               | -0.247                                        | 7.718                           | 0.069                                 | 1440.66                          | -0.091                           | 60.29                            | 22.015                                 | 1421.51                                        | 1.4585 | 0.00129      |
| 1.0000          | 937.31                               | 0.000                                         | 7.725                           | 0.000                                 | 1431.73                          | 0.000                            | 58.66                            | 0.000                                  | 0.00                                           | 1.4589 | 0.00000      |
| <b>298.15 K</b> |                                      |                                               |                                 |                                       |                                  |                                  |                                  |                                        |                                                |        |              |
| 0.0000          | 997.05                               | 0.000                                         | 2.565                           | 0.000                                 | 1496.80                          | 0.000                            | 0.90                             | 0.000                                  | 0.00                                           | 1.3331 | 0.00000      |
| 0.0975          | 983.73                               | -0.557                                        | 6.769                           | 1.693                                 | 1596.27                          | -1.152                           | 6.85                             | 5.536                                  | 4912.72                                        | 1.3984 | 0.00537      |
| 0.1951          | 972.34                               | -0.847                                        | 7.570                           | 1.488                                 | 1567.74                          | -1.132                           | 15.28                            | 13.361                                 | 6321.05                                        | 1.4244 | 0.00731      |
| 0.2936          | 963.80                               | -0.999                                        | 7.793                           | 1.165                                 | 1533.63                          | -0.961                           | 25.00                            | 22.181                                 | 6725.16                                        | 1.4372 | 0.00705      |
| 0.3943          | 956.88                               | -1.041                                        | 7.871                           | 0.896                                 | 1505.66                          | -0.778                           | 34.26                            | 30.101                                 | 6533.68                                        | 1.4445 | 0.00608      |
| 0.4930          | 951.35                               | -0.996                                        | 7.837                           | 0.633                                 | 1483.43                          | -0.611                           | 39.21                            | 33.109                                 | 5824.06                                        | 1.4490 | 0.00506      |
| 0.5925          | 946.62                               | -0.878                                        | 7.811                           | 0.438                                 | 1464.64                          | -0.457                           | 43.81                            | 34.829                                 | 4982.49                                        | 1.4518 | 0.00382      |
| 0.6975          | 942.40                               | -0.695                                        | 7.787                           | 0.279                                 | 1448.91                          | -0.318                           | 45.11                            | 31.617                                 | 3825.30                                        | 1.4539 | 0.00271      |
| 0.7920          | 939.16                               | -0.493                                        | 7.776                           | 0.174                                 | 1435.02                          | -0.192                           | 45.50                            | 26.028                                 | 2704.65                                        | 1.4554 | 0.00195      |
| 0.8938          | 936.14                               | -0.243                                        | 7.757                           | 0.073                                 | 1424.82                          | -0.092                           | 44.27                            | 15.354                                 | 1375.95                                        | 1.4565 | 0.00108      |
| 1.0000          | 933.69                               | 0.000                                         | 7.754                           | 0.000                                 | 1415.72                          | 0.000                            | 43.66                            | 0.000                                  | 0.00                                           | 1.4571 | 0.00000      |
| <b>303.15 K</b> |                                      |                                               |                                 |                                       |                                  |                                  |                                  |                                        |                                                |        |              |
| 0.0000          | 995.65                               | 0.000                                         | 3.010                           | 0.000                                 | 1509.53                          | 0.000                            | 0.79                             | 0.000                                  | 0.00                                           | 1.3322 | 0.00000      |
| 0.0975          | 980.38                               | -0.534                                        | 6.904                           | 1.581                                 | 1587.12                          | -1.117                           | 5.65                             | 4.507                                  | 4874.04                                        | 1.3969 | 0.00526      |
| 0.1951          | 968.65                               | -0.818                                        | 7.681                           | 1.433                                 | 1553.86                          | -1.106                           | 12.20                            | 10.555                                 | 6259.26                                        | 1.4226 | 0.00709      |

|          |        |        |       |       |         |        |       |        |         |        |         |
|----------|--------|--------|-------|-------|---------|--------|-------|--------|---------|--------|---------|
| 0.2936   | 960.03 | -0.969 | 7.903 | 1.153 | 1518.73 | -0.945 | 19.53 | 17.157 | 6650.31 | 1.4353 | 0.00684 |
| 0.3943   | 953.10 | -1.012 | 7.987 | 0.920 | 1490.41 | -0.768 | 25.84 | 22.381 | 6400.73 | 1.4425 | 0.00583 |
| 0.4930   | 947.61 | -0.973 | 7.921 | 0.642 | 1467.70 | -0.604 | 29.54 | 24.534 | 5709.66 | 1.4470 | 0.00485 |
| 0.5925   | 942.91 | -0.859 | 7.885 | 0.451 | 1449.33 | -0.456 | 32.86 | 25.589 | 4876.35 | 1.4498 | 0.00365 |
| 0.6975   | 938.73 | -0.682 | 7.847 | 0.290 | 1432.25 | -0.309 | 33.81 | 23.043 | 3733.45 | 1.4519 | 0.00256 |
| 0.7920   | 935.51 | -0.483 | 7.822 | 0.178 | 1418.25 | -0.184 | 34.21 | 18.867 | 2633.52 | 1.4534 | 0.00182 |
| 0.8938   | 932.51 | -0.238 | 7.796 | 0.077 | 1408.61 | -0.088 | 33.47 | 11.005 | 1331.17 | 1.4545 | 0.00096 |
| 1.0000   | 930.07 | 0.000  | 7.783 | 0.000 | 1399.85 | 0.000  | 33.43 | 0.000  | 0.00    | 1.4552 | 0.00000 |
| <hr/>    |        |        |       |       |         |        |       |        |         |        |         |
| 308.15 K |        |        |       |       |         |        |       |        |         |        |         |
| 0.0000   | 994.03 | 0.000  | 3.455 | 0.000 | 1520.29 | 0.000  | 0.69  | 0.000  | 0.00    | 1.3314 | 0.00000 |
| 0.0975   | 976.97 | -0.511 | 7.040 | 1.471 | 1577.06 | -1.084 | 4.69  | 3.708  | 4861.36 | 1.3954 | 0.00514 |
| 0.1951   | 964.91 | -0.789 | 7.793 | 1.379 | 1539.85 | -1.082 | 9.91  | 8.511  | 6243.95 | 1.4208 | 0.00690 |
| 0.2936   | 956.21 | -0.939 | 8.012 | 1.141 | 1503.75 | -0.930 | 15.55 | 13.552 | 6620.04 | 1.4333 | 0.00657 |
| 0.3943   | 949.28 | -0.982 | 8.104 | 0.943 | 1474.09 | -0.753 | 20.44 | 17.562 | 6380.94 | 1.4405 | 0.00565 |
| 0.4930   | 943.84 | -0.948 | 8.005 | 0.652 | 1451.90 | -0.596 | 22.94 | 18.826 | 5661.78 | 1.4449 | 0.00463 |
| 0.5925   | 939.19 | -0.839 | 7.958 | 0.464 | 1433.59 | -0.451 | 25.10 | 19.196 | 4803.08 | 1.4477 | 0.00346 |
| 0.6975   | 935.04 | -0.667 | 7.908 | 0.301 | 1416.38 | -0.305 | 25.76 | 17.131 | 3667.46 | 1.4498 | 0.00241 |
| 0.7920   | 931.85 | -0.474 | 7.867 | 0.182 | 1402.68 | -0.183 | 26.39 | 14.240 | 2610.80 | 1.4513 | 0.00168 |
| 0.8938   | 928.87 | -0.234 | 7.835 | 0.081 | 1392.95 | -0.087 | 25.82 | 8.252  | 1318.63 | 1.4524 | 0.00085 |
| 1.0000   | 926.45 | 0.000  | 7.813 | 0.000 | 1384.17 | 0.000  | 25.81 | 0.000  | 0.00    | 1.4532 | 0.00000 |
| <hr/>    |        |        |       |       |         |        |       |        |         |        |         |
| 313.15 K |        |        |       |       |         |        |       |        |         |        |         |
| 0.0000   | 992.22 | 0.000  | 3.901 | 0.000 | 1529.42 | 0.000  | 0.61  | 0.000  | 0.00    | 1.3305 | 0.00000 |
| 0.0975   | 973.50 | -0.490 | 7.176 | 1.681 | 1566.84 | -1.057 | 3.92  | 3.062  | 4827.81 | 1.3941 | 0.00493 |
| 0.1951   | 961.13 | -0.761 | 7.904 | 1.609 | 1526.93 | -1.069 | 8.14  | 6.932  | 6217.66 | 1.4194 | 0.00667 |
| 0.2936   | 952.37 | -0.909 | 8.122 | 1.366 | 1488.46 | -0.915 | 12.92 | 11.208 | 6658.46 | 1.4319 | 0.00639 |
| 0.3943   | 945.41 | -0.950 | 8.221 | 1.148 | 1459.07 | -0.747 | 16.24 | 13.811 | 6330.27 | 1.4391 | 0.00549 |
| 0.4930   | 940.05 | -0.923 | 8.089 | 0.797 | 1436.26 | -0.591 | 17.98 | 14.546 | 5593.38 | 1.4434 | 0.00438 |
| 0.5925   | 935.44 | -0.819 | 8.032 | 0.578 | 1417.33 | -0.444 | 19.50 | 14.634 | 4727.97 | 1.4462 | 0.00323 |
| 0.6975   | 931.33 | -0.652 | 7.968 | 0.384 | 1400.79 | -0.304 | 20.08 | 13.044 | 3612.81 | 1.4483 | 0.00219 |
| 0.7920   | 928.18 | -0.464 | 7.913 | 0.224 | 1388.11 | -0.190 | 20.42 | 10.629 | 2548.67 | 1.4499 | 0.00157 |
| 0.8938   | 925.23 | -0.229 | 7.874 | 0.105 | 1377.38 | -0.087 | 20.29 | 6.295  | 1305.52 | 1.4510 | 0.00074 |
| 1.0000   | 922.83 | 0.000  | 7.842 | 0.000 | 1368.57 | 0.000  | 20.30 | 0.000  | 0.00    | 1.4519 | 0.00000 |

<sup>a</sup> Standard uncertainties  $u$  are:  $u(T)$  = 0.01 K for density, speed of sound and viscosity and  $u(T)$  = 0.1 K for refractive index,  $u(p)$  = 10 kPa,  $u(x_1)$  =  $1 \cdot 10^{-4}$ ,  $u(\rho)$  = 0.035 kg·m<sup>-3</sup>,  $u(u)$  = 0.2 m·s<sup>-1</sup>,  $u_r(\eta)$  = 1% ,  $u(n_D)$  = 0.0002

Table S5 Parameters of the JAM equation, together with *RMSD* and *ARD%* for density, speed of sound, viscosity and refractive index of DES (1) + water (2) systems at different temperatures.

| <i>T</i> / K                 | 293.15               | 298.15   | 303.15   | 308.15   | 313.15   | 293.15               | 298.15   | 303.15   | 308.15   | 313.15   |
|------------------------------|----------------------|----------|----------|----------|----------|----------------------|----------|----------|----------|----------|
| $\rho$ / kg·m <sup>-3</sup>  |                      |          |          |          |          |                      |          |          |          |          |
|                              | DES1 (1) + water (2) |          |          |          |          | DES2 (1) + water (2) |          |          |          |          |
| <i>A</i> <sub>0</sub>        | 24.8275              | 23.7395  | 22.6995  | 21.7383  | 20.8103  | 5.7143               | 4.2731   | 2.8780   | 1.5468   | 0.2672   |
| <i>A</i> <sub>1</sub>        | -27.0200             | -25.8625 | -24.7000 | -23.6118 | -22.6113 | -13.9849             | -12.6833 | -11.3833 | -10.1036 | -8.8636  |
| <i>A</i> <sub>2</sub>        | 26.7075              | 24.7500  | 23.0350  | 21.3838  | 19.9113  | 16.3915              | 14.9069  | 13.3060  | 11.7903  | 10.3483  |
| <i>A</i> <sub>3</sub>        | -17.9650             | -16.4675 | -15.1600 | -13.9238 | -12.6038 | -9.7227              | -7.6083  | -5.9668  | -4.4809  | -3.0999  |
| <i>A</i> <sub>4</sub>        | -                    | -        | -        | -        | -        | -0.5512              | -1.9659  | -2.6380  | -3.2256  | -3.7564  |
| <i>R</i> <sup>2</sup>        | 0.9999               | 0.9999   | 0.9999   | 0.9999   | 0.9999   | 0.9996               | 0.9994   | 0.9993   | 0.9992   | 0.9990   |
| <i>RMSD</i>                  | 0.00017              | 0.00016  | 0.00013  | 0.00013  | 0.00013  | 0.00014              | 0.00014  | 0.00013  | 0.00011  | 0.00010  |
| <i>ARD%</i>                  | 0.0094               | 0.0086   | 0.0068   | 0.0063   | 0.0064   | 0.0073               | 0.0074   | 0.0067   | 0.0060   | 0.0054   |
|                              | DES3 (1) + water (2) |          |          |          |          | DES4 (1) + water (2) |          |          |          |          |
| <i>A</i> <sub>0</sub>        | 13.5545              | 12.3320  | 11.1835  | 10.0645  | 8.9810   | -15.2749             | -17.2111 | -19.0931 | -20.9427 | -22.7449 |
| <i>A</i> <sub>1</sub>        | -21.6575             | -20.4875 | -19.3300 | -18.2375 | -17.1650 | 6.3675               | 7.8770   | 9.3910   | 10.8915  | 12.4003  |
| <i>A</i> <sub>2</sub>        | 29.3125              | 27.2200  | 25.2725  | 23.4350  | 21.7125  | -4.3187              | -5.4068  | -6.4975  | -7.5559  | -8.5685  |
| <i>A</i> <sub>3</sub>        | -23.8975             | -21.7775 | -19.915  | -18.1625 | -16.5600 | -4.6725              | -1.7230  | 0.9155   | 3.3840   | 5.6678   |
| <i>A</i> <sub>4</sub>        | -                    | -        | -        | -        | -        | 7.7956               | 4.6164   | 1.7841   | -0.8624  | -3.3666  |
| <i>R</i> <sup>2</sup>        | 0.9991               | 0.9992   | 0.9993   | 0.9993   | 0.9994   | 0.9995               | 0.9998   | 0.9995   | 0.9999   | 0.9999   |
| <i>RMSD</i>                  | 0.00037              | 0.00032  | 0.00027  | 0.00024  | 0.00020  | 0.00016              | 0.00011  | 0.00008  | 0.00005  | 0.00004  |
| <i>ARD%</i>                  | 0.020                | 0.017    | 0.015    | 0.012    | 0.010    | 0.0087               | 0.0062   | 0.0039   | 0.0026   | 0.0018   |
| <i>u</i> / m·s <sup>-1</sup> |                      |          |          |          |          |                      |          |          |          |          |
|                              | DES1 (1) + water (2) |          |          |          |          | DES2 (1) + water (2) |          |          |          |          |
| <i>A</i> <sub>0</sub>        | 126.286              | 116.013  | 108.149  | 100.740  | 92.017   | 136.992              | 128.015  | 120.735  | 111.169  | 103.579  |
| <i>A</i> <sub>1</sub>        | -127.313             | -121.125 | -113.488 | -106.725 | -101.388 | -138.025             | -133.000 | -126.000 | -121.438 | -115.475 |
| <i>A</i> <sub>2</sub>        | 114.750              | 112.000  | 112.450  | 106.125  | 99.588   | 126.350              | 125.250  | 122.000  | 117.500  | 112.213  |
| <i>A</i> <sub>3</sub>        | -258.188             | -243.875 | -228.613 | -214.475 | -201.663 | -263.275             | -242.500 | -225.000 | -209.063 | -193.475 |

|                      |          |          |          |          |          |                      |          |          |          |          |
|----------------------|----------|----------|----------|----------|----------|----------------------|----------|----------|----------|----------|
| $A_4$                | 234.594  | 206.188  | 177.731  | 161.500  | 145.525  | 248.038              | 225.250  | 203.875  | 186.656  | 172.494  |
| $R^2$                | 0.9994   | 0.9994   | 0.9994   | 0.9994   | 0.9995   | 0.9995               | 0.9992   | 0.9993   | 0.9992   | 0.9992   |
| $RMSD$               | 0.0025   | 0.0024   | 0.0020   | 0.0022   | 0.0016   | 0.0023               | 0.0026   | 0.0034   | 0.0023   | 0.0021   |
| %ARD                 | 0.14     | 0.13     | 0.11     | 0.12     | 0.09     | 0.12                 | 0.15     | 0.19     | 0.13     | 0.12     |
| DES3 (1) + water (2) |          |          |          |          |          | DES4 (1) + water (2) |          |          |          |          |
| $A_0$                | 86.371   | 79.321   | 67.809   | 59.512   | 51.428   | 34.050               | 22.706   | 11.316   | 0.518    | -9.699   |
| $A_1$                | -106.713 | -98.563  | -93.988  | -87.900  | -81.000  | -41.275              | -32.387  | -25.325  | -16.862  | -9.175   |
| $A_2$                | 96.600   | 93.250   | 87.200   | 82.975   | 77.875   | 28.975               | 25.025   | 14.037   | 9.713    | 9.487    |
| $A_3$                | -293.088 | -272.938 | -254.113 | -236.400 | -221.500 | -179.525             | -162.913 | -146.125 | -130.338 | -113.775 |
| $A_4$                | 307.944  | 284.219  | 264.731  | 244.288  | 227.063  | 213.100              | 189.619  | 177.631  | 158.275  | 135.331  |
| $R^2$                | 0.9981   | 0.9982   | 0.9983   | 0.9983   | 0.9983   | 0.9957               | 0.9955   | 0.9951   | 0.9948   | 0.9946   |
| $RMSD$               | 0.0044   | 0.0044   | 0.0039   | 0.003    | 0.0027   | 0.0032               | 0.0027   | 0.0024   | 0.0020   | 0.0017   |
| %ARD                 | 0.22     | 0.22     | 0.20     | 0.15     | 0.13     | 0.16                 | 0.14     | 0.12     | 0.10     | 0.08     |
| $\eta$ / mPa's       |          |          |          |          |          |                      |          |          |          |          |
| DES1 (1) + water (2) |          |          |          |          |          | DES2 (1) + water (2) |          |          |          |          |
| $A_0$                | 2197.11  | 2136.93  | 2070.94  | 2019.88  | 1968.01  | 2097.76              | 2027.09  | 1961.63  | 1929.09  | 1877.78  |
| $A_1$                | -1403.39 | -1356.08 | -1317.26 | -1308.93 | -1310.74 | -1544.04             | -1499.41 | -1459.13 | -1336.26 | -1291.43 |
| $A_2$                | 1449.19  | 1447.63  | 1428.56  | 1539.63  | 1614.44  | 1287.94              | 1331.56  | 1407.88  | 1493.06  | 1646.63  |
| $A_3$                | -450.26  | -515.33  | -644.89  | -599.68  | -583.61  | -518.41              | -517.04  | -501.88  | -831.89  | -924.68  |
| $R^2$                | 0.9998   | 0.9998   | 0.9997   | 0.9996   | 0.9996   | 0.9994               | 0.9994   | 0.9995   | 0.9995   | 0.9998   |
| $RMSD$               | 0.016    | 0.016    | 0.017    | 0.021    | 0.019    | 0.027                | 0.025    | 0.023    | 0.022    | 0.014    |
| %ARD                 | 0.89     | 0.90     | 0.97     | 1.14     | 1.11     | 1.57                 | 1.47     | 1.35     | 1.31     | 0.79     |
| DES3 (1) + water (2) |          |          |          |          |          | DES4 (1) + water (2) |          |          |          |          |
| $A_0$                | 2186.81  | 2114.56  | 2034.01  | 2009.49  | 1958.05  | 2307.65              | 2227.63  | 2157.71  | 2120.71  | 2307.65  |
| $A_1$                | -1527.24 | -1458.39 | -1475.74 | -1383.16 | -1380.75 | -1459.50             | -1458.38 | -1447.00 | -1483.13 | -1459.50 |
| $A_2$                | 1537.94  | 1511.69  | 1500.44  | 1499.06  | 1478.75  | 707.25               | 756.63   | 814.38   | 822.75   | 707.25   |
| $A_3$                | -936.61  | -944.76  | -875.61  | -1011.79 | -1100.25 | -1744.50             | -1682.63 | -1697.50 | -1607.38 | -1744.50 |
| $A_4$                | -        | -        | -        | -        | -        | 1861.75              | 1748.00  | 1651.56  | 1659.44  | 1861.75  |
| $R^2$                | 0.9994   | 0.9994   | 0.9991   | 0.9984   | 0.9982   | 0.9994               | 0.9992   | 0.9993   | 0.9991   | 0.9992   |

|                      |          |                      |          |          |          |          |                      |          |          |          |
|----------------------|----------|----------------------|----------|----------|----------|----------|----------------------|----------|----------|----------|
| <i>RMSD</i>          | 0.029    | 0.027                | 0.032    | 0.041    | 0.042    | 0.031    | 0.033                | 0.030    | 0.032    | 0.032    |
| <i>%ARD</i>          | 1.66     | 1.54                 | 1.84     | 2.24     | 2.31     | 1.63     | 1.76                 | 1.62     | 1.72     | 1.72     |
| <i>n<sub>D</sub></i> |          |                      |          |          |          |          |                      |          |          |          |
|                      |          | DES1 (1) + water (2) |          |          |          |          | DES2 (1) + water (2) |          |          |          |
| <i>A<sub>0</sub></i> | 47.4950  | 47.9388              | 48.3913  | 48.7650  | 49.0938  | 45.5112  | 45.9000              | 46.3138  | 46.7975  | 47.1188  |
| <i>A<sub>1</sub></i> | -36.1950 | -36.4238             | -36.6013 | -36.5350 | -36.5387 | -32.7513 | -33.5775             | -33.6663 | -34.5525 | -34.8613 |
| <i>A<sub>2</sub></i> | 34.4450  | 34.8513              | 35.4238  | 35.6050  | 35.9413  | 36.2188  | 36.4450              | 36.0763  | 36.3975  | 36.1013  |
| <i>A<sub>3</sub></i> | -24.9000 | -25.5913             | -26.3188 | -27.5150 | -28.4463 | -28.1588 | -27.6875             | -29.1488 | -29.4275 | -30.1938 |
| <i>R<sup>2</sup></i> | 0.9996   | 0.9996               | 0.9996   | 0.9995   | 0.9995   | 0.9993   | 0.9993               | 0.9993   | 0.9994   | 0.9994   |
| <i>RMSD</i>          | 0.00055  | 0.00053              | 0.00053  | 0.00056  | 0.00059  | 0.00068  | 0.00067              | 0.00065  | 0.00063  | 0.00061  |
| <i>%ARD</i>          | 0.032    | 0.031                | 0.031    | 0.032    | 0.035    | 0.038    | 0.037                | 0.037    | 0.035    | 0.034    |
|                      |          | DES3 (1) + water (2) |          |          |          |          | DES4 (1) + water (2) |          |          |          |
| <i>A<sub>0</sub></i> | 43.7650  | 44.1175              | 44.4300  | 44.8650  | 45.1475  | 45.1613  | 45.4413              | 45.7138  | 45.9388  | 46.3888  |
| <i>A<sub>1</sub></i> | -34.9100 | -35.2425             | -35.5825 | -35.9075 | -36.1875 | -36.0987 | -36.3288             | -36.6013 | -36.8012 | -37.4362 |
| <i>A<sub>2</sub></i> | 35.4550  | 35.4125              | 35.3850  | 35.3950  | 35.4025  | 46.8688  | 47.0938              | 47.4063  | 47.6563  | 48.1063  |
| <i>A<sub>3</sub></i> | -26.8750 | -26.7625             | -26.6325 | -26.7675 | -26.9275 | -42.2863 | -43.1663             | -43.7638 | -44.2138 | -44.2988 |
| <i>R<sup>2</sup></i> | 0.9993   | 0.9994               | 0.9994   | 0.9994   | 0.9994   | 0.9981   | 0.9981               | 0.9981   | 0.9981   | 0.9982   |
| <i>RMSD</i>          | 0.00064  | 0.00061              | 0.00059  | 0.00059  | 0.00058  | 0.0012   | 0.0011               | 0.0011   | 0.0011   | 0.0011   |
| <i>%ARD</i>          | 0.036    | 0.034                | 0.033    | 0.032    | 0.033    | 0.064    | 0.064                | 0.064    | 0.063    | 0.063    |

Table S6. Parameters  $A_i$  of Eq. (6) and the corresponding  $RSMD$  for TBAB:AP (DES1) + water mixtures at the temperatures (293.15 to 303.15) K and atmospheric pressure.

| Function                                      | $T / K$ | $A_0$   | $A_1$    | $A_2$   | $A_3$  | $A_4$  | RMSD     |
|-----------------------------------------------|---------|---------|----------|---------|--------|--------|----------|
| DES1 (1) + water (2)                          |         |         |          |         |        |        |          |
| $10^6 V^E / \text{m}^3 \cdot \text{mol}^{-1}$ | 293.15  | -3.840  | 1.863    | -0.129  | -      | -      | 0.018    |
|                                               | 298.15  | -3.749  | 1.754    | -0.007  | -      | -      | 0.018    |
|                                               | 303.15  | -3.669  | 1.631    | 0.079   | -      | -      | 0.018    |
|                                               | 308.15  | -3.584  | 1.531    | 0.169   | -      | -      | 0.018    |
|                                               | 313.15  | -3.499  | 1.428    | 0.223   | -      | -      | 0.018    |
| $10^4 \Delta\alpha_p / \text{K}^{-1}$         | 293.15  | 3.016   | -6.327   | 11.333  | -7.618 | -      | 0.023    |
|                                               | 298.15  | 2.999   | -6.024   | 10.333  | -7.210 | -      | 0.019    |
|                                               | 303.15  | 3.012   | -5.738   | 9.335   | -6.808 | -      | 0.035    |
|                                               | 308.15  | 2.930   | -5.450   | 8.342   | -6.409 | -      | 0.015    |
|                                               | 313.15  | 2.905   | -5.157   | 7.353   | -6.013 | -      | 0.015    |
| $10^{10} k_S^E / \text{Pa}^{-1}$              | 293.15  | -2.532  | 2.831    | -2.489  | 7.174  | -7.083 | 0.0084   |
|                                               | 298.15  | -2.451  | 2.745    | -2.487  | 6.687  | -6.168 | 0.0076   |
|                                               | 303.15  | -2.385  | 2.648    | -2.562  | 6.213  | -5.288 | 0.0074   |
|                                               | 308.15  | -2.311  | 2.590    | -2.470  | 5.796  | -4.740 | 0.0067   |
|                                               | 313.15  | -2.269  | 2.518    | -2.384  | 5.430  | -4.231 | 0.0056   |
| $\Delta\eta / \text{mPa} \cdot \text{s}$      | 293.15  | 210.80  | 172.56   | 63.53   | 124.95 | -      | 0.28     |
|                                               | 298.15  | 150.86  | 115.90   | 41.61   | 86.34  | -      | 0.15     |
|                                               | 303.15  | 111.51  | 80.56    | 23.86   | 52.64  | -      | 0.14     |
|                                               | 308.15  | 83.62   | 54.50    | 26.76   | 55.38  | -      | 0.09     |
|                                               | 313.15  | 63.96   | 37.74    | 24.30   | 47.84  | -      | 0.08     |
| $\Delta G^E / \text{J} \cdot \text{mol}^{-1}$ | 293.15  | 21652   | -14563   | 13324   | -      | -      | 84       |
|                                               | 298.15  | 21233   | -14378   | 13376   | -      | -      | 93       |
|                                               | 303.15  | 20769   | -14423   | 13306   | -      | -      | 112      |
|                                               | 308.15  | 20408   | -14287   | 14249   | -      | -      | 110      |
|                                               | 313.15  | 20046   | -14306   | 14901   | -      | -      | 108      |
| $\Delta n_D$                                  | 293.15  | 0.02405 | -0.02670 | 0.01050 | -      | -      | 0.000098 |
|                                               | 298.15  | 0.02333 | -0.02580 | 0.01018 | -      | -      | 0.000095 |
|                                               | 303.15  | 0.02248 | 0.02475  | 0.01058 | -      | -      | 0.000081 |
|                                               | 308.15  | 0.02158 | 0.02365  | 0.00953 | -      | -      | 0.000061 |
|                                               | 313.15  | 0.02100 | 0.02250  | 0.00940 | -      | -      | 0.000049 |

Table S7. Parameters  $A_i$  of Eq. (6) and the corresponding  $RSMD$  for TBAC:AP (DES2) + water mixtures at the temperatures (293.15 to 303.15) K and atmospheric pressure.

| Function                                      | $T / K$ | $A_0$  | $A_1$  | $A_2$  | $A_3$   | $A_4$ | $RSMD$ |
|-----------------------------------------------|---------|--------|--------|--------|---------|-------|--------|
| DES2 (1) + water (2)                          |         |        |        |        |         |       |        |
| $10^6 V^E / \text{m}^3 \cdot \text{mol}^{-1}$ | 293.15  | -3.892 | 1.937  | -0.511 | -       | -     | 0.013  |
|                                               | 298.15  | -3.801 | 1.815  | -0.390 | -       | -     | 0.013  |
|                                               | 303.15  | -3.710 | 1.706  | -0.297 | -       | -     | 0.012  |
|                                               | 308.15  | -3.621 | 1.603  | -0.218 | -       | -     | 0.012  |
|                                               | 313.15  | -3.533 | 1.507  | -0.147 | -       | -     | 0.011  |
|                                               | 293.15  | 3.100  | -5.499 | 11.699 | -11.308 | -     | 0.016  |

|                                             |        |         |         |         |         |        |          |
|---------------------------------------------|--------|---------|---------|---------|---------|--------|----------|
| $10^4 \Delta\alpha_p / \text{K}^{-1}$       | 298.15 | 3.101   | -5.451  | 10.574  | -9.668  | -      | 0.011    |
|                                             | 303.15 | 3.088   | -5.412  | 9.451   | -8.033  | -      | 0.008    |
|                                             | 308.15 | 3.088   | -5.366  | 8.333   | -6.402  | -      | 0.006    |
|                                             | 313.15 | 3.087   | -5.325  | 7.218   | -4.775  | -      | 0.008    |
| $10^{10} k_S^E / \text{Pa}^{-1}$            | 293.15 | -2.674  | 2.973   | -2.636  | 7.238   | -7.503 | 0.0089   |
|                                             | 298.15 | -2.587  | 2.927   | -2.676  | 6.588   | -6.704 | 0.0090   |
|                                             | 303.15 | -2.508  | 2.870   | -2.648  | 6.054   | -5.996 | 0.0083   |
|                                             | 308.15 | -2.426  | 2.822   | -2.610  | 5.580   | -5.427 | 0.0073   |
|                                             | 313.15 | -2.379  | 2.757   | -2.545  | 5.143   | -4.959 | 0.0068   |
| $\Delta\eta / \text{mPa}\cdot\text{s}$      | 293.15 | 186.34  | 107.75  | 7.62    | 119.36  | -      | 0.48     |
|                                             | 298.15 | 131.40  | 69.93   | 12.51   | 91.90   | -      | 0.31     |
|                                             | 303.15 | 96.61   | 47.32   | 17.87   | 76.02   | -      | 0.21     |
|                                             | 308.15 | 74.69   | 40.07   | 14.30   | 42.15   | -      | 0.10     |
|                                             | 313.15 | 57.16   | 30.35   | 18.05   | 31.69   | -      | 0.06     |
| $\Delta G^E / \text{J}\cdot\text{mol}^{-1}$ | 293.15 | 20791   | -15851  | 11984   | -       | -      | 105      |
|                                             | 298.15 | 20268   | -15531  | 12383   | -       | -      | 104      |
|                                             | 303.15 | 19795   | -15202  | 13049   | -       | -      | 100      |
|                                             | 308.15 | 19622   | -15047  | 13933   | -       | -      | 141      |
|                                             | 313.15 | 19271   | -14950  | 15285   | -       | -      | 147      |
| $\Delta n_D$                                | 293.15 | 0.02351 | 0.02009 | 0.02854 | 0.01186 | -      | 0.000056 |
|                                             | 298.15 | 0.02213 | 0.02198 | 0.02683 | 0.00743 | -      | 0.000062 |
|                                             | 303.15 | 0.02174 | 0.02009 | 0.02271 | 0.01261 | -      | 0.000045 |
|                                             | 308.15 | 0.02006 | 0.02169 | 0.02104 | 0.01136 | -      | 0.000061 |
|                                             | 313.15 | 0.01940 | 0.02135 | 0.01775 | 0.01340 | -      | 0.000050 |

Table S8 Parameters  $A_i$  of Eq. (6) and the corresponding  $RSMD$  for TBAB:MAE (DES3) + water mixtures at the temperatures (293.15 to 303.15) K and atmospheric pressure.

| Function                                    | $T / \text{K}$ | $A_0$  | $A_1$  | $A_2$  | $A_3$   | $A_4$  | $RSMD$ |
|---------------------------------------------|----------------|--------|--------|--------|---------|--------|--------|
| DES3 (1) + water (2)                        |                |        |        |        |         |        |        |
| $10^6 V^E / \text{m}^3\cdot\text{mol}^{-1}$ | 293.15         | -4.274 | 2.720  | -1.044 | -       | -      | 0.011  |
|                                             | 298.15         | -4.200 | 2.580  | -0.924 | -       | -      | 0.011  |
|                                             | 303.15         | -4.126 | 2.452  | -0.816 | -       | -      | 0.010  |
|                                             | 308.15         | -4.051 | 2.335  | -0.717 | -       | -      | 0.010  |
|                                             | 313.15         | -3.977 | 2.221  | -0.633 | -       | -      | 0.010  |
| $10^4 \Delta\alpha_p / \text{K}^{-1}$       | 293.15         | 2.765  | -5.444 | 7.854  | -12.486 | 8.919  | 0.015  |
|                                             | 298.15         | 2.732  | -5.304 | 7.553  | -11.321 | 7.769  | 0.014  |
|                                             | 303.15         | 2.696  | -5.166 | 7.256  | -10.159 | 6.625  | 0.015  |
|                                             | 308.15         | 2.672  | -5.024 | 6.963  | -9.000  | 5.485  | 0.014  |
|                                             | 313.15         | 2.642  | -4.891 | 6.668  | -7.846  | 4.348  | 0.014  |
| $10^{10} k_S^E / \text{Pa}^{-1}$            | 293.15         | -3.164 | 3.551  | -2.920 | 8.644   | -9.214 | 0.0120 |
|                                             | 298.15         | -3.106 | 3.531  | -2.911 | 8.059   | -8.443 | 0.0108 |
|                                             | 303.15         | -3.070 | 3.505  | -2.864 | 7.535   | -7.827 | 0.0097 |
|                                             | 308.15         | -3.036 | 3.489  | -2.846 | 7.071   | -7.230 | 0.0088 |
|                                             | 313.15         | -3.018 | 3.446  | -2.814 | 6.704   | -6.730 | 0.0082 |
| $\Delta\eta / \text{mPa}\cdot\text{s}$      | 293.15         | 155.32 | 50.59  | -29.09 | 71.03   | -      | 0.16   |

|                                             |        |         |          |         |       |   |          |
|---------------------------------------------|--------|---------|----------|---------|-------|---|----------|
| $\Delta G^E / \text{J}\cdot\text{mol}^{-1}$ | 298.15 | 111.72  | 35.88    | -17.09  | 48.62 | - | 0.10     |
|                                             | 303.15 | 82.12   | 18.82    | -11.04  | 44.44 | - | 0.11     |
|                                             | 308.15 | 64.46   | 16.44    | -8.22   | 29.55 | - | 0.11     |
|                                             | 313.15 | 50.02   | 10.03    | -7.77   | 20.57 | - | 0.09     |
|                                             | 293.15 | 21711   | -16843   | 14212   | -     | - | 157      |
|                                             | 298.15 | 21183   | -16342   | 14037   | -     | - | 157      |
|                                             | 303.15 | 20579   | -16359   | 13958   | -     | - | 155      |
|                                             | 308.15 | 20452   | -15983   | 14035   | -     | - | 183      |
|                                             | 313.15 | 20103   | -16232   | 13937   | -     | - | 196      |
|                                             | 293.15 | 0.02393 | -0.03685 | 0.02643 | -     | - | 0.000023 |
| $\Delta n_D$                                | 298.15 | 0.02318 | -0.03580 | 0.02423 | -     | - | 0.000020 |
|                                             | 303.15 | 0.02245 | -0.03500 | 0.02230 | -     | - | 0.000027 |
|                                             | 308.15 | 0.02163 | -0.03415 | 0.02023 | -     | - | 0.000024 |
|                                             | 313.15 | 0.02088 | -0.03335 | 0.01863 | -     | - | 0.000035 |
|                                             |        |         |          |         |       |   |          |

Table S9 Parameters  $A_i$  of Eq. (6) and the corresponding  $RSMD$  for TBAB:BAE (DES4) + water mixtures at the temperatures (293.15 to 303.15) K and atmospheric pressure.

| Function                                       | $T / \text{K}$ | $A_0$   | $A_1$    | $A_2$   | $A_3$   | $A_4$  | $RSMD$   |
|------------------------------------------------|----------------|---------|----------|---------|---------|--------|----------|
| DES4 (1) + water (2)                           |                |         |          |         |         |        |          |
| $10^6 V^E / \text{m}^3 \cdot \text{mol}^{-1}$  | 293.15         | -4.045  | 2.112    | -0.822  | -       | -      | 0.019    |
|                                                | 298.15         | -3.954  | 1.994    | -0.710  | -       | -      | 0.017    |
|                                                | 303.15         | -3.860  | 1.884    | -0.621  | -       | -      | 0.016    |
|                                                | 308.15         | -3.763  | 1.779    | -0.548  | -       | -      | 0.015    |
|                                                | 313.15         | -3.662  | 1.680    | -0.490  | -       | -      | 0.014    |
| $10^4 \Delta\alpha_p / \text{K}^{-1}$          | 293.15         | 2.570   | -3.022   | 2.439   | -13.078 | 15.448 | 0.026    |
|                                                | 298.15         | 2.615   | -3.185   | 2.404   | -11.655 | 13.894 | 0.025    |
|                                                | 303.15         | 2.632   | -3.385   | 2.349   | -10.245 | 12.347 | 0.025    |
|                                                | 308.15         | 2.710   | -3.521   | 2.324   | -8.834  | 10.806 | 0.025    |
|                                                | 313.15         | 3.299   | -4.296   | 2.684   | -9.634  | 11.835 | 0.030    |
| $10^{10} k_S^E / \text{Pa}^{-1}$               | 293.15         | -2.469  | 2.659    | -1.919  | 7.471   | -8.403 | 0.0110   |
|                                                | 298.15         | -2.444  | 2.599    | -1.975  | 7.146   | -7.802 | 0.0100   |
|                                                | 303.15         | -2.436  | 2.580    | -1.805  | 6.840   | -7.601 | 0.0094   |
|                                                | 308.15         | -2.391  | 2.544    | -1.838  | 6.581   | -7.193 | 0.0083   |
|                                                | 313.15         | -2.366  | 2.535    | -1.999  | 6.310   | -6.681 | 0.0086   |
| $\Delta\eta / \text{mPa} \cdot \text{s}$       | 293.15         | 190.38  | 80.90    | -55.30  | 24.71   | -      | 0.18     |
|                                                | 298.15         | 135.50  | 48.85    | -35.76  | 24.08   | -      | 0.14     |
|                                                | 303.15         | 100.35  | 30.76    | -24.54  | 17.62   | -      | 0.09     |
|                                                | 308.15         | 76.61   | 17.27    | -15.40  | 17.10   | -      | 0.08     |
|                                                | 313.15         | 59.55   | 6.93     | -12.38  | 22.52   | -      | 0.07     |
| $\Delta G^E / \text{J} \cdot \text{kmol}^{-1}$ | 293.15         | 23563   | -19656   | 16934   | -       | -      | 299      |
|                                                | 298.15         | 23008   | -19563   | 16883   | -       | -      | 291      |
|                                                | 303.15         | 22545   | -19569   | 17015   | -       | -      | 289      |
|                                                | 308.15         | 22329   | -19709   | 17139   | -       | -      | 281      |
|                                                | 313.15         | 22100   | -19957   | 17170   | -       | -      | 260      |
| $\Delta n_D$                                   | 293.15         | 0.02000 | -0.02513 | 0.02695 | -       | -      | 0.000029 |
|                                                | 298.15         | 0.01929 | -0.02399 | 0.02551 | -       | -      | 0.000027 |
|                                                | 303.15         | 0.01854 | -0.02324 | 0.02481 | -       | -      | 0.000024 |
|                                                | 308.15         | 0.01773 | -0.02273 | 0.02413 | -       | -      | 0.000029 |
|                                                | 313.15         | 0.01686 | -0.02321 | 0.02319 | -       | -      | 0.000020 |

Table S10 Isobaric thermal expansion coefficient ( $\alpha_p$ ), isochoric molar heat capacity( $C_P$ ), Flory theory parameters: characteristic volume( $V^*$ ), reduce volume ( $\tilde{V}$ ), characteristic pressure ( $P^*$ ), and ratio of molecular surface to volume ratio ( $S_1/S_2$ ) of DES to water.

| DES   | $T / K$ | $10^4 \alpha / K^{-1}$ | $C_p$<br>/ $J \cdot mol^{-1} \cdot K^{-1}$ | $10^6 V^*$<br>/ $m^3 \cdot mol^{-1}$ | $\tilde{V}$ | $10^8 P^* / Pa$ | $S_1/S_2$ |
|-------|---------|------------------------|--------------------------------------------|--------------------------------------|-------------|-----------------|-----------|
| DES1  |         |                        |                                            |                                      |             |                 |           |
|       | 293.15  | 7.334                  | 257.4                                      | 91.563                               | 1.188       | 7.199           | 0.571     |
|       | 298.15  | 7.343                  | 260.7                                      | 91.670                               | 1.191       | 7.209           | 0.569     |
|       | 303.15  | 7.351                  | 264.0                                      | 91.780                               | 1.194       | 7.215           | 0.566     |
|       | 308.15  | 7.359                  | 268.4                                      | 91.890                               | 1.196       | 7.221           | 0.564     |
|       | 313.15  | 7.368                  | 272.8                                      | 92.003                               | 1.199       | 7.226           | 0.562     |
| DES2  |         |                        |                                            |                                      |             |                 |           |
|       | 293.15  | 7.305                  | 249.8                                      | 90.515                               | 1.187       | 7.111           | 0.573     |
|       | 298.15  | 7.315                  | 250.9                                      | 90.618                               | 1.190       | 7.110           | 0.571     |
|       | 303.15  | 7.325                  | 252.9                                      | 90.721                               | 1.193       | 7.115           | 0.568     |
|       | 308.15  | 7.336                  | 254.0                                      | 90.827                               | 1.196       | 7.110           | 0.566     |
|       | 313.15  | 7.346                  | 256.1                                      | 90.934                               | 1.199       | 7.108           | 0.564     |
| DES3  |         |                        |                                            |                                      |             |                 |           |
|       | 293.15  | 7.342                  | 187.7                                      | 94.326                               | 1.188       | 5.550           | 0.565     |
|       | 298.15  | 7.372                  | 190.7                                      | 94.399                               | 1.191       | 5.574           | 0.563     |
|       | 303.15  | 7.403                  | 194.7                                      | 94.473                               | 1.195       | 5.601           | 0.561     |
|       | 308.15  | 7.433                  | 203.2                                      | 94.549                               | 1.198       | 5.646           | 0.559     |
|       | 313.15  | 7.463                  | 212.4                                      | 94.627                               | 1.202       | 5.690           | 0.557     |
| DES4  |         |                        |                                            |                                      |             |                 |           |
|       | 293.15  | 7.725                  | 284.2                                      | 130.676                              | 1.196       | 5.255           | 0.507     |
|       | 298.15  | 7.754                  | 288.2                                      | 130.796                              | 1.200       | 5.266           | 0.505     |
|       | 303.15  | 7.783                  | 290.6                                      | 130.918                              | 1.203       | 5.270           | 0.503     |
|       | 308.15  | 7.813                  | 294.0                                      | 131.044                              | 1.207       | 5.277           | 0.501     |
|       | 313.15  | 7.842                  | 297.9                                      | 131.173                              | 1.210       | 5.282           | 0.499     |
| Water |         |                        |                                            |                                      |             |                 |           |
|       | 293.15  | 2.120                  | 75.4                                       | 17.031                               | 1.060       | 1.520           | -         |
|       | 298.15  | 2.565                  | 75.3                                       | 16.843                               | 1.073       | 1.945           | -         |
|       | 303.15  | 3.010                  | 75.3                                       | 16.661                               | 1.086       | 2.405           | -         |
|       | 308.15  | 3.455                  | 75.2                                       | 16.485                               | 1.099       | 2.898           | -         |
|       | 313.15  | 3.901                  | 75.2                                       | 16.315                               | 1.113       | 3.420           | -         |

Table S11 Partial molar volumes of DESs and water in their binary mixtures at  $T = (293.15 \text{ to } 313.15) \text{ K}$  and at atmospheric pressure (0.1 MPa)<sup>a</sup>

| $x_l$                | $10^6 \bar{V}_1$<br>/ $\text{m}^3 \cdot \text{mol}^{-1}$ | $10^6 \bar{V}_2$<br>/ $\text{m}^3 \cdot \text{mol}^{-1}$ | $10^6 \bar{V}_1$<br>/ $\text{m}^3 \cdot \text{mol}^{-1}$ | $10^6 \bar{V}_2$<br>/ $\text{m}^3 \cdot \text{mol}^{-1}$ | $10^6 \bar{V}_1$<br>/ $\text{m}^3 \cdot \text{mol}^{-1}$ | $10^6 \bar{V}_2$<br>/ $\text{m}^3 \cdot \text{mol}^{-1}$ | $10^6 \bar{V}_1$<br>/ $\text{m}^3 \cdot \text{mol}^{-1}$ | $10^6 \bar{V}_2$<br>/ $\text{m}^3 \cdot \text{mol}^{-1}$ | $10^6 \bar{V}_1$<br>/ $\text{m}^3 \cdot \text{mol}^{-1}$ | $10^6 \bar{V}_2$<br>/ $\text{m}^3 \cdot \text{mol}^{-1}$ |
|----------------------|----------------------------------------------------------|----------------------------------------------------------|----------------------------------------------------------|----------------------------------------------------------|----------------------------------------------------------|----------------------------------------------------------|----------------------------------------------------------|----------------------------------------------------------|----------------------------------------------------------|----------------------------------------------------------|
| $T / \text{K}$       | 293.15                                                   |                                                          | 298.15                                                   |                                                          | 303.15                                                   |                                                          | 308.15                                                   |                                                          | 313.15                                                   |                                                          |
| DES1 (1) + water (2) |                                                          |                                                          |                                                          |                                                          |                                                          |                                                          |                                                          |                                                          |                                                          |                                                          |
| 0.0000               | 102.91                                                   | 18.05                                                    | 103.60                                                   | 18.07                                                    | 104.32                                                   | 18.09                                                    | 105.00                                                   | 18.12                                                    | 105.65                                                   | 18.16                                                    |
| 0.0994               | 104.68                                                   | 18.03                                                    | 105.20                                                   | 18.05                                                    | 105.79                                                   | 18.07                                                    | 106.33                                                   | 18.10                                                    | 106.87                                                   | 18.13                                                    |
| 0.1981               | 106.03                                                   | 17.98                                                    | 106.45                                                   | 17.98                                                    | 106.96                                                   | 18.01                                                    | 107.42                                                   | 18.03                                                    | 107.89                                                   | 18.06                                                    |
| 0.2979               | 107.04                                                   | 17.88                                                    | 107.41                                                   | 17.88                                                    | 107.87                                                   | 17.91                                                    | 108.30                                                   | 17.93                                                    | 108.73                                                   | 17.95                                                    |
| 0.3961               | 107.75                                                   | 17.75                                                    | 108.10                                                   | 17.73                                                    | 108.54                                                   | 17.77                                                    | 108.95                                                   | 17.79                                                    | 109.36                                                   | 17.82                                                    |
| 0.4983               | 108.24                                                   | 17.56                                                    | 108.59                                                   | 17.53                                                    | 109.03                                                   | 17.59                                                    | 109.43                                                   | 17.61                                                    | 109.83                                                   | 17.64                                                    |
| 0.5987               | 108.53                                                   | 17.32                                                    | 108.90                                                   | 17.29                                                    | 109.32                                                   | 17.37                                                    | 109.73                                                   | 17.41                                                    | 110.13                                                   | 17.44                                                    |
| 0.6999               | 108.68                                                   | 17.04                                                    | 109.06                                                   | 17.00                                                    | 109.49                                                   | 17.12                                                    | 109.89                                                   | 17.17                                                    | 110.29                                                   | 17.21                                                    |
| 0.8000               | 108.74                                                   | 16.71                                                    | 109.13                                                   | 16.67                                                    | 109.55                                                   | 16.83                                                    | 109.95                                                   | 16.90                                                    | 110.36                                                   | 16.95                                                    |
| 0.9000               | 108.75                                                   | 16.35                                                    | 109.14                                                   | 16.30                                                    | 109.55                                                   | 16.50                                                    | 109.96                                                   | 16.59                                                    | 110.36                                                   | 16.65                                                    |
| 1.0000               | 108.74                                                   | 15.94                                                    | 109.14                                                   | 15.88                                                    | 109.54                                                   | 16.13                                                    | 109.95                                                   | 16.24                                                    | 110.35                                                   | 16.31                                                    |
| $V_l^o$              | 108.74                                                   | 18.05                                                    | 109.14                                                   | 18.07                                                    | 109.54                                                   | 18.09                                                    | 109.95                                                   | 18.12                                                    | 110.35                                                   | 18.16                                                    |
| DES2 (1) + water (2) |                                                          |                                                          |                                                          |                                                          |                                                          |                                                          |                                                          |                                                          |                                                          |                                                          |
| 0.0000               | 101.23                                                   | 18.05                                                    | 101.94                                                   | 18.07                                                    | 102.63                                                   | 18.09                                                    | 103.30                                                   | 18.12                                                    | 103.95                                                   | 18.16                                                    |
| 0.0986               | 103.22                                                   | 18.04                                                    | 103.78                                                   | 18.06                                                    | 104.32                                                   | 18.08                                                    | 104.87                                                   | 18.11                                                    | 105.40                                                   | 18.14                                                    |
| 0.1973               | 104.69                                                   | 17.99                                                    | 105.15                                                   | 18.01                                                    | 105.62                                                   | 18.03                                                    | 106.08                                                   | 18.05                                                    | 106.54                                                   | 18.08                                                    |
| 0.2961               | 105.74                                                   | 17.91                                                    | 106.15                                                   | 17.92                                                    | 106.57                                                   | 17.93                                                    | 106.99                                                   | 17.95                                                    | 107.41                                                   | 17.98                                                    |
| 0.3962               | 106.46                                                   | 17.76                                                    | 106.86                                                   | 17.77                                                    | 107.25                                                   | 17.79                                                    | 107.65                                                   | 17.81                                                    | 108.05                                                   | 17.84                                                    |
| 0.4925               | 106.91                                                   | 17.57                                                    | 107.30                                                   | 17.58                                                    | 107.69                                                   | 17.60                                                    | 108.08                                                   | 17.63                                                    | 108.48                                                   | 17.66                                                    |
| 0.5954               | 107.20                                                   | 17.29                                                    | 107.59                                                   | 17.32                                                    | 107.98                                                   | 17.35                                                    | 108.38                                                   | 17.38                                                    | 108.78                                                   | 17.42                                                    |
| 0.6946               | 107.34                                                   | 16.97                                                    | 107.74                                                   | 17.01                                                    | 108.14                                                   | 17.05                                                    | 108.53                                                   | 17.1                                                     | 108.93                                                   | 17.15                                                    |
| 0.7996               | 107.41                                                   | 16.56                                                    | 107.81                                                   | 16.62                                                    | 108.21                                                   | 16.69                                                    | 108.61                                                   | 16.75                                                    | 109.01                                                   | 16.82                                                    |
| 0.9019               | 107.43                                                   | 16.12                                                    | 107.83                                                   | 16.20                                                    | 108.23                                                   | 16.28                                                    | 108.62                                                   | 16.37                                                    | 109.02                                                   | 16.45                                                    |
| 1.0000               | 107.43                                                   | 15.66                                                    | 107.83                                                   | 15.76                                                    | 108.23                                                   | 15.86                                                    | 108.62                                                   | 15.96                                                    | 109.02                                                   | 16.05                                                    |
| $V_l^o$              | 107.44                                                   | 18.05                                                    | 107.83                                                   | 18.07                                                    | 108.23                                                   | 18.09                                                    | 108.62                                                   | 18.12                                                    | 109.02                                                   | 18.16                                                    |
| DES3 (1) + water (2) |                                                          |                                                          |                                                          |                                                          |                                                          |                                                          |                                                          |                                                          |                                                          |                                                          |
| 0.0000               | 104.00                                                   | 18.05                                                    | 104.75                                                   | 18.07                                                    | 105.47                                                   | 18.09                                                    | 106.18                                                   | 18.12                                                    | 106.88                                                   | 18.16                                                    |

|                      |        |       |        |       |        |       |        |       |        |       |
|----------------------|--------|-------|--------|-------|--------|-------|--------|-------|--------|-------|
| 0.0978               | 106.93 | 18.06 | 107.51 | 18.07 | 108.07 | 18.10 | 108.64 | 18.12 | 109.20 | 18.15 |
| 0.1982               | 109.00 | 18.05 | 109.48 | 18.06 | 109.95 | 18.08 | 110.42 | 18.10 | 110.90 | 18.13 |
| 0.2957               | 110.33 | 18.00 | 110.75 | 18.01 | 111.17 | 18.02 | 111.60 | 18.03 | 112.04 | 18.06 |
| 0.3970               | 111.17 | 17.88 | 111.57 | 17.88 | 111.98 | 17.89 | 112.39 | 17.90 | 112.80 | 17.92 |
| 0.4958               | 111.64 | 17.67 | 112.03 | 17.67 | 112.43 | 17.69 | 112.84 | 17.70 | 113.26 | 17.73 |
| 0.5935               | 111.87 | 17.38 | 112.27 | 17.39 | 112.68 | 17.41 | 113.09 | 17.43 | 113.51 | 17.46 |
| 0.6956               | 111.97 | 16.98 | 112.38 | 17.00 | 112.80 | 17.04 | 113.21 | 17.07 | 113.63 | 17.11 |
| 0.7979               | 112.01 | 16.50 | 112.43 | 16.55 | 112.84 | 16.59 | 113.26 | 16.65 | 113.69 | 16.70 |
| 0.8940               | 112.03 | 16.01 | 112.44 | 16.07 | 112.86 | 16.13 | 113.28 | 16.20 | 113.70 | 16.27 |
| 1.000                | 112.04 | 15.45 | 112.45 | 15.52 | 112.87 | 15.60 | 113.29 | 15.69 | 113.71 | 15.77 |
| $V_t^o$              | 112.04 | 18.05 | 112.45 | 18.07 | 112.87 | 18.09 | 113.29 | 18.12 | 113.71 | 18.16 |
| DES4 (1) + water (2) |        |       |        |       |        |       |        |       |        |       |
| 0.0000               | 149.34 | 18.05 | 150.27 | 18.07 | 151.17 | 18.09 | 152.06 | 18.12 | 152.94 | 18.16 |
| 0.0975               | 151.75 | 18.05 | 152.52 | 18.07 | 153.29 | 18.09 | 154.05 | 18.12 | 154.82 | 18.15 |
| 0.1951               | 153.45 | 18.02 | 154.13 | 18.04 | 154.81 | 18.06 | 155.50 | 18.08 | 156.19 | 18.11 |
| 0.2936               | 154.61 | 17.95 | 155.24 | 17.96 | 155.87 | 17.98 | 156.51 | 18.00 | 157.17 | 18.03 |
| 0.3943               | 155.37 | 17.81 | 155.97 | 17.82 | 156.58 | 17.83 | 157.21 | 17.85 | 157.84 | 17.88 |
| 0.4930               | 155.81 | 17.58 | 156.41 | 17.60 | 157.02 | 17.62 | 157.63 | 17.64 | 158.25 | 17.68 |
| 0.5925               | 156.06 | 17.27 | 156.67 | 17.30 | 157.27 | 17.33 | 157.89 | 17.36 | 158.51 | 17.40 |
| 0.6975               | 156.20 | 16.85 | 156.81 | 16.90 | 157.42 | 16.94 | 158.03 | 16.99 | 158.66 | 17.04 |
| 0.7920               | 156.26 | 16.41 | 156.87 | 16.47 | 157.49 | 16.53 | 158.10 | 16.59 | 158.72 | 16.66 |
| 0.8938               | 156.30 | 15.88 | 156.91 | 15.96 | 157.52 | 16.04 | 158.14 | 16.12 | 158.76 | 16.20 |
| 1.0000               | 156.32 | 15.29 | 156.93 | 15.40 | 157.54 | 15.50 | 158.15 | 15.59 | 158.77 | 15.68 |
| $V_t^o$              | 156.32 | 18.05 | 156.93 | 18.07 | 157.54 | 18.09 | 158.15 | 18.12 | 158.77 | 18.16 |
